1 **Title:** The role of the gut microbiota in the effects of early-life stress and dietary fatty acids  
2 on later-life central and metabolic outcomes in mice

3

4 **Running title:** Effects of early stress and fatty acids on microbiota

5

6 **Authors:** Kitty Reemst<sup>1</sup>, Sebastian Tims<sup>2</sup>, Kit-Yi Yam<sup>1</sup>, Mona Mischke<sup>2</sup>, Jan Knol<sup>2</sup>, Stanley Brul<sup>1</sup>,  
7 Lidewij Schipper<sup>2</sup>, Aniko Korosi<sup>1</sup>

8

9 **Affiliations:**

10 <sup>1</sup>: *Swammerdam Institute for Life Sciences, Universiteit van Amsterdam, Sciencepark 904, 1098 XH,*  
11 *Amsterdam, the Netherlands*

12 <sup>2</sup>: Danone Nutricia Research, Utrecht, the Netherlands

13

14 **Corresponding author:** Dr. Aniko Korosi. [A.korosi@uva.nl](mailto:A.korosi@uva.nl)

15

16

17

18

19

20

21

22

23

24

25

26

27

28

29

30

31 **Abstract**

32 Early-life stress (ELS) leads to increased vulnerability for mental and metabolic disorders. We have  
33 previously shown that dietary low  $\omega$ -6/ $\omega$ -3 polyunsaturated fatty acid (PUFA) ratio is able to protect  
34 against ELS-induced cognitive impairments. Due to the importance of the gut microbiota as  
35 determinants of long-term health, we here study the impact of ELS and dietary PUFA's on the gut  
36 microbiota, and how this relates to the previously described cognitive, metabolic and fatty acid  
37 profiles.

38 Male mice were exposed to ELS via the limited bedding and nesting paradigm (postnatal day (P)2 –  
39 P9) and to an early diet (P2 – P42) with either high (15) or low (1)  $\omega$ -6 linoleic acid to  $\omega$ -3 alpha-  
40 linolenic acid ratio. 16S ribosomal RNA was sequenced and analyzed from fecal samples at P21, P42  
41 and P180.

42 ELS increased  $\beta$ -diversity at P42, which persisted into adulthood. The low  $\omega$ -6/ $\omega$ -3 diet prevented the  
43 ELS-induced increase in  $\beta$ -diversity, at P42. At the level of taxa abundance, for example, the  
44 abundance of the phyla Bacteroidetes increased while Actinobacteria and Verrucomicrobia decreased  
45 with age; ELS reduced the relative abundance of the genera *RC9 gut group* and *Rikenella* into  
46 adulthood and the low  $\omega$ -6/ $\omega$ -3 diet reduced the abundance of the Firmicutes *Erysipelotrichia*. At P42,  
47 species abundance correlated with body fat mass and circulating leptin (e.g. Bacteroidetes and  
48 Proteobacteria taxa) and fatty acid profiles (e.g. Firmicutes taxa).

49 This study gives novel insights into the impact of age, ELS and dietary PUFAs on microbiota  
50 composition, providing potential targets for non-invasive (nutritional) modulation of the ELS-induced  
51 deficits.

52

53 Keywords: early-life stress, diet, interventions, polyunsaturated fatty acids, microbiota, microbiome, gut-brain-  
54 axis

55

56

57

58

59

60

61

62

63 **Importance**

64 Early-life stress (ELS) leads to increased vulnerability to develop mental and metabolic disorders, however the  
65 biological mechanisms leading to such programming are not fully clear. Increased attention has been given to  
66 the importance of the gut microbiota as determinant of long term health and as potential target for non-  
67 invasive nutritional strategies to protect against the negative impact of ELS. Here we give novel insights in the  
68 complex interaction between ELS, early dietary  $\omega$ -3 availability and the gut microbiota across ages and  
69 provides new potential targets for (nutritional) modulation of the long-term effects of the early-life  
70 environment via the microbiota.

71

72

## 73 Introduction

74 There is ample clinical and preclinical evidence that early-life stress (ELS) is associated with  
75 increased vulnerability to mental and metabolic health problems such as depression and inflammatory  
76 bowel disease<sup>1-4</sup>. We and others have shown in recent years that chronic ELS induced in rodent  
77 models via the limited bedding and nesting material (LBN) paradigm<sup>5,6</sup> leads to impaired cognitive  
78 functions and an altered metabolic profile<sup>7,8</sup>. Moreover, we demonstrated that early postnatal  
79 exposure to diet with a low  $\omega$ -6 to  $\omega$ -3 polyunsaturated fatty acid (PUFA) ratio was able to protect  
80 against the ELS-induced cognitive deficits without affecting the metabolic alterations<sup>9</sup>. Currently the  
81 exact underlying mechanisms for the effects of ELS and the beneficial effect of the diet are not fully  
82 understood and may be multi-factorial. In this paper we address the effects of ELS and dietary  $\omega$ -6/ $\omega$ -  
83 3 PUFA ratio on fecal microbiota and if and how these relate to the effects of ELS and early postnatal  
84 diet on both the brain and metabolism across different ages that we reported earlier<sup>9</sup>.

85 In recent years, there has been an increasing interest in how the gut microbiome might  
86 impact our health<sup>10,11</sup>. Particular attention has been devoted to the cross talk between the gut  
87 microbiota and the brain, known as the microbiota – gut – brain (MGB) axis, an integrated  
88 communication system including neural, hormonal and immunological signaling pathways through  
89 which the gut microbiota can influence brain development and function and vice versa<sup>12,13</sup>. Increasing  
90 evidence supports the intriguing hypothesis that the microbiota can influence brain functions, that  
91 dysbiosis might contribute to changes in behaviour (e.g. social behaviour<sup>14</sup>) and the development and  
92 etiology of brain disorders (e.g. depression<sup>15-18</sup>) and that targeting the microbiota is effective in  
93 modulating brain function (e.g. cognitive functions<sup>19</sup>). Similarly, the gut microbiota are also thought to  
94 impact greatly on the immune system and metabolic health and has been associated with various risk  
95 factors of obesity and metabolic syndrome<sup>20</sup>.

96 Several elements are emerging to be key in modulating the microbiome composition,  
97 including developmental life stages, stress and diet<sup>13,21,22</sup>. In fact, the development of the microbiome  
98 coincides with crucial (neuro)developmental periods. While little is known of the exact developmental  
99 trajectory of the microbiome in mice, we know from human literature that the intestinal microbiome  
100 starts to develop during and shortly after birth, during which time the brain is also going through  
101 immense developmental changes<sup>23</sup>. Preclinical evidence shows that various early postnatal stress  
102 paradigms, in different species, impact the gut microbiota<sup>24</sup>. For example, maternal separation (MS)

103 has been shown to increase intestinal permeability in rats<sup>4,25</sup>, and affect the microbiota composition of  
104 the gut microbiota of infant Rhesus monkeys directly after separation<sup>26</sup> and of 7-week old rats<sup>27</sup>. Such  
105 microbial composition changes may be instrumental for establishment of some of the MS-induced  
106 anxiety-related alterations, as germ free mice were not affected by MS to the same extent as  
107 colonized mice<sup>28</sup>. Also chronic ELS induced via the limited bedding and nesting material (LBN)  
108 paradigm<sup>6</sup> in male rats led to changes in microbiota composition and increased intestinal permeability  
109 at weaning age<sup>29</sup>. Thus the early-life adversity-induced dysbiosis could possibly contribute to later life  
110 mental and metabolic health<sup>10,23,24,30,31</sup>.

111 Next to development and exposure to early adversity, diet, and more specifically, dietary  
112 PUFA composition has also been shown to modulate the composition of the gut microbiota at different  
113 stages of life<sup>32,33</sup>. For example, an 8-week supplementation with  $\omega$ -3 long chain (LC)PUFAs including  
114 docosahexaenoic acid (DHA) and eicosapentaenoic acid (EPA) in middle-aged healthy individuals led  
115 to multiple changes in bacterial taxa including an increased abundance of genera involved in butyrate  
116 production, which have been suggested to be important for mental health<sup>15,34</sup>. The abundance of  
117 dietary  $\omega$ -3 and  $\omega$ -6 PUFAs during early life phases is also highly relevant as these are key factors for  
118 proper development and function of the brain<sup>35</sup> and can influence the microbiome<sup>33</sup>.

119 In the last century, there has been a marked change in the consumption of  $\omega$ -6 and  $\omega$ -3  
120 PUFAs, with a high intake of especially  $\omega$ -6 linoleic acid (LA) in western societies, resulting in a high  
121  $\omega$ -6/ $\omega$ -3 ratio<sup>36</sup>. Given the relevance of dietary  $\omega$ -6/ $\omega$ -3 for brain development and function<sup>35</sup>, this shift  
122 is thought to increase today's prevalence of psychopathology and chronic disease<sup>37</sup>, and possibly  
123 also contributes to gut dysbiosis and thereby impacting on the MGB-axis<sup>32</sup>. Therefore, dietary fatty  
124 acids have been explored as possible strategy to modulate (stress-induced) behavioral changes and  
125 cognitive functioning<sup>9,38-41</sup>. In particular, the possible protective actions of  $\omega$ -3 PUFA during different  
126 life stages on the early-life stress induced effects have been explored<sup>9,40,42</sup>. Pusceddu and colleagues  
127 demonstrated that long-term exposure to a diet with low  $\omega$ -6/ $\omega$ -3 ratio (i.e. between 5 and 17 weeks  
128 of age by supplementation with  $\omega$ -3 LCPUFAs including DHA) was beneficial for anxiety and cognition  
129 in non-stressed female rats, and could restore part of the disturbed gut-microbiota composition of MS  
130 female rats which was associated with the attenuation of the cortisol response to an acute  
131 stressor<sup>40,42</sup>. While this consisted of a lifelong intervention starting at 5 weeks of age, we have  
132 recently shown that a relatively short dietary intervention with low  $\omega$ -6/ $\omega$ -3 diet starting in the early

133 postnatal period (i.e. from postnatal day 2 - 42), is able to restore the effects of ELS (via LBN)  
134 exposure, on brain FA composition early in life and on cognitive functions and brain plasticity in  
135 adulthood, without modulating the ELS-induced alterations in body fat mass and circulating leptin in  
136 mice<sup>9</sup>.

137 Here we study the effects of ELS, using the LBN paradigm in mice (P2 and P9), an early  
138 dietary intervention with low  $\omega$ -6 linoleic acid (LA) to  $\omega$ -3 alpha-linolenic acid (ALA) ratio (P2 and P42)  
139 and their interaction on the short-term (at P42) and long-term (at P180, after exposure to regular diet  
140 from P42 onwards) impact on the gut microbiota composition and if and how these changes relate to  
141 the earlier reported central and metabolic ELS-induced profiles described in the same cohort of mice<sup>9</sup>.

142

## 143 **Material and Methods**

144

### 145 **2.1 Animals**

146 In the current study we describe microbiome data from the same mice from our previous publication<sup>9</sup>.  
147 In brief, male (6 weeks old) and primiparous female (8 weeks old) C57Bl/6J mice were purchased  
148 from Harlan Laboratories B.V. (Venray, the Netherlands). After arrival at the animal facility, the mice  
149 were put on a synthetic AIN-93G diet (Ssniff-Spezialdiäten GmbH, Germany)<sup>43</sup> and housed in a  
150 controlled environment (temperature  $22\pm 1^\circ\text{C}$ , humidity  $55\pm 5\%$ ) with *ad libitum* food and water, under  
151 a 12:12 h light-dark cycle schedule (lights on at 8 AM). After two weeks of acclimatization, mice were  
152 bred in house by housing two females with one male for one week in a type-II long cage.  
153 Subsequently females were housed in single-sex pairs for another week, and after that pregnant  
154 females were housed individually in a standard cage (type-I short cage) covered with a filter top.  
155 Females were monitored daily, between 9 and 10 AM, for the birth of pups. When a litter was  
156 detected, the previous day was designated the day of birth (postnatal day (P)0). At P2, dams with  
157 litter were randomly assigned to control (CTR) or ELS condition, see 2.2 and to one of the  
158 experimental diets (see 2.3). At P21, offspring was weaned and male offspring was housed in groups  
159 (littermates; 2 or 3 animals per cage) in type-II long cages with standard amount of bedding material.  
160 Mice were kept on their respective diet until P42, after which all groups were switched to standard  
161 semi-synthetic diet (AIN93M)<sup>43</sup> until end of the study.

162 All experimental procedures were approved by the Animal Welfare Body of the University of

163 Amsterdam, and the Central Authority for Scientific Procedures on Animals (CCD – Centrale  
164 Commissie Dierproeven) in compliance with Dutch legislation and the principles of good laboratory  
165 animal care following the EU directive for the protection of animals used for scientific purposes.

166

## 167 **2.2 Chronic early-life stress exposure**

168 We used the chronic ELS model, based on the limited bedding and nesting (LBN) stress paradigm as  
169 described before by our group and others<sup>5,7,9</sup>. The LBN paradigm induces fragmentation of maternal  
170 care which results in chronic stress in the pups. At P2, litters were culled to six pups per litter (sex  
171 ratio m:f of 3:3 or 4:2) without cross fostering, randomly assigned to CTR or ELS condition. In ELS  
172 cages, the bottom was covered with a little amount of sawdust bedding and a fine-gauge stainless  
173 steel mesh is placed 1 cm above the cage floor. Half a square piece of cotton nesting material (2,5 x 5  
174 cm, Technilab-BMI, Someren, the Netherlands) was placed on top of the mesh. Control cages were  
175 equipped with standard amounts of sawdust bedding and nesting material (one square piece of cotton  
176 nesting material (5x5cm). Cages were equipped with food and water *ad libitum* and covered with a  
177 filtertop. Throughout all procedures, manipulation was kept to a minimum to avoid handling effects  
178 and animals were left undisturbed until P9. On the morning of P9, bodyweight of the dams and pups  
179 and the consumed amount of food and/or water was measured, this data can be found in our previous  
180 publication<sup>9</sup>. From P9 onwards all animals were housed in cages equipped with a standard amount of  
181 nesting and bedding material.

182

## 183 **2.3 Experimental diets**

184 Experimental diets were provided from P2 onwards to dam with litter, and after weaning (P21)  
185 offspring were kept on their respective diet until P42. During lactation, fatty acid composition of the  
186 maternal diet, in particular LA and DHA, is reflected in milk fatty acid composition<sup>43</sup>. The two  
187 experimental diets (Ssniff-Spezialdiäten GmbH, Soest, Germany) were semi-synthetic differing only in  
188 LA/ALA ratio that was either a high (15) or low (1.1) The diets were isocaloric and contained a macro-  
189 and micronutrient composition according to the AIN93-G purified diets for laboratory rodents<sup>44</sup>  
190 (Supplementary Table S1). Experimental groups are referred to as: CTL- and ELS-high; control and  
191 ELS-exposed animals that received a diet with  $\omega$ -6/ $\omega$ -3 ratio=15 and CTL- and ELS-low; control and  
192 ELS-exposed animals that received a diet with  $\omega$ -6/ $\omega$ -3 ratio=1.1.

193

#### 194 **2.4 Fecal sample collection, DNA extraction and sequencing**

195 Fresh fecal samples were collected during a brief handling moment of approximately 2 minutes,  
196 from three separate age cohorts, P21, P42 and P180. One or two pellets per animal were snap frozen  
197 and stored at -80°C until further analysis. The N per group was as follows: P21: CTL-high: 3, ELS-  
198 high: 5, CTL-low: 5, ELS-low: 5; P42: CTL-high:9, ELS-high: 14, CTL-low: 7, ELS-low: 7; P180: CTL-  
199 high: 11, ELS-high: 11, CTL-low: 10, ELS-low: 9.

200 DNA extraction from these samples was performed with QIAmp DNA Stool Mini Kit (Qiagen)  
201 according to the manufacturer's protocol except for the addition of two bead-beating steps. To 0.2 –  
202 0.3 g of fecal sample 300 mg of 0.1 mm glass beads together with 1.4 mL of ASL (lysis) buffer and on  
203 this suspension the first bead-beating step was applied for 3x 30 sec (FastPrep-24 instrument  
204 program 5.5). After addition of the InhibitEx tablet the second bead-beating step was applied for 3x 30  
205 sec (FastPrep-24 instrument program 5.5) to homogenize the sample. Following each bead-beating  
206 step samples were cooled for 5 min on ice. Extracted DNA purity was checked using the NanoDrop™  
207 spectrophotometer (Thermo Fisher Scientific Inc.), whereas DNA quality and concentration was  
208 measured using the Quant-iT™ 193 dsDNA BR Assay kit (Invitrogen™). DNA aliquots were stored at  
209 -20°C until use.

210 On the purified fecal DNA extracts primers Bact-0341F (5'-CCTACGGGNGGCWGCAG-3') and  
211 Bact-0785R (5'-GACTACHVGGGTATCTAATCC-3')<sup>45</sup> were used to amplify the V3–V4 regions of the  
212 bacterial 16S rRNA gene and the generated amplicons were subsequently sequenced on a Illumina  
213 MiSeq instrument as described previously<sup>46</sup>.

214

#### 215 **2.5 Sequencing analysis**

216 Sequencing data was analyzed using the Quantitative Insights Into Microbial Ecology (QIIME) v.1.9.0  
217 pipeline<sup>47</sup>. Sequences with mismatched primers were discarded. Quality control filters were set to  
218 retain sequences with: a length between 200 and 1000 bases; a mean sequence quality score >15 in  
219 a five-nucleotide window; no ambiguous bases. The filtered sequences were grouped into Operational  
220 Taxonomic Units (OTUs) by *de novo* OTU picking using the USEARCH algorithm<sup>48</sup> at 97% sequence  
221 identity. Subsequently, the Ribosomal Database Project Classifier (RDP)<sup>49</sup> was applied to assign  
222 taxonomy to the representative sequence (i.e. the most abundant sequence) of each OTU by



223 alignment to the SILVA ribosomal RNA database (release version 1.1.9)<sup>50</sup>. ChimeraSlayer<sup>51</sup> was  
224 applied, as part of QIIME, to filter for chimeric sequences and these were excluded from all  
225 downstream analyses. Representative OTUs were aligned using PyNAST<sup>47</sup> and used to build a  
226 phylogenetic tree with FastTree<sup>52</sup>, which was used to calculate UniFrac<sup>53</sup>. OTUs that could not be  
227 aligned with PyNAST, singletons and low abundant OTUs with a relative abundance <0.002% were  
228 excluded. Weighted UniFrac distances were used to assess the (dis)similarities between the  
229 samples<sup>53,54</sup>. Rarefaction was applied to the OTUs by QIIME to ensure identical number of reads per  
230 sample in order to perform  $\alpha$ -diversity calculations using the Chao1 metric.

231

## 232 **2.6 Statistical analyses**

233 The microbial diversity within each sample ( $\alpha$ -diversity) was assessed to investigate the  
234 overall microbiota development between P21, P42 and P180. The average Chao1 value for each  
235 sample at each sequencing depth, resulting from the rarefaction procedure, was visualized. The  
236 average Chao1 values were grouped per diet, condition, as per age and expressed as mean  $\pm$   
237 standard error of the mean (SEM). The Three-Way Generalized Linear Mixed Model (GLMM) was  
238 performed at the a sequencing depth of 11,535 sequences. Considering the low sample sizes of the  
239 P21 samples ( $n = 3$  to 5 per experimental group), these were excluded from further analyses.  
240 Therefore, a Two-Way GLMM was performed only at P42 and P180 separately, at the highest  
241 sequencing depth.

242 Between sample microbiota profile (dis)similarity ( $\beta$ -diversity), was assessed both on OTU  
243 level with Weighted Unifrac and on genus level, with aggregated data, at P42 and P180 separately  
244 (due to the strong separation between the two ages (Supplementary Fig. 1A). At each age a Two-  
245 Way ANOVA with two predictor variables (i.e., condition and diet) and interactions thereof on the  
246 Weighted Unifrac distances within the four experimental groups (homogeneity) was performed. In  
247 addition, Weighted Unifrac distances of samples between the four experimental groups were plotted  
248 and analyzed with a Kruskal-Wallis analysis of variance and Dunn's multiple comparison test  
249 (Supplementary Fig. 1B. Principal component analysis (PCA) and distance-based redundancy  
250 analysis (db-RDA), using Bray-Curtis metrics, were performed on the OTU data aggregated at genus-  
251 level taxonomy to assess the influence of condition, diet and their interactions on the fecal microbiota  
252 composition at each age separately. Since litter effects have been shown to drive gut microbiota

253 variation in common laboratory mice<sup>55</sup>, litter correction was applied to the db-RDA calculations. Data  
254 at genus level was Log transformed and standardized by Hellinger transformation<sup>56</sup>. Significance of  
255 the explained variance in the db-RDAs were assessed with ANOVA-like permutation test for  
256 Redundancy Analysis<sup>57</sup>. The 10 genera explaining the most variation in the PCA and db-RDA were  
257 visualized. The db-RDA procedures were performed using the vegan package(version2.5-7) in  
258 R(version 3.6.2).

259 Next, the impact of condition, diet, and age on the microbial taxa abundances was  
260 investigated. To this end the sequence data was aggregated at the following taxonomic levels: genus,  
261 family, order, and at phylum. Also for microbial taxa abundances, litter was accounted for in the  
262 statistical analysis. GLMM was used to determine whether litter has a significant effect on the  
263 sequence data derived abundances of a taxonomic group within every taxonomic level and in cases  
264 where it did, it was taken along as a co-variate in the GLMM. In order to estimate the effect of age, a  
265 Three-Way GLMM was performed on the sequence data derived abundances of each taxonomic  
266 group within every taxonomic level, and in order to estimate the effect of condition and diet, a Two-  
267 Way GLMM was employed on each age group (P42 and P180) separately. After performing an  
268 GLMM, the resulting sets of p-values, one set for each of the predictor variables and interactions  
269 thereof, were used to estimate the false discovery rate (FDR) by calculating q-values<sup>58</sup>. Resulting p-  
270 values <0.05 with corresponding q-values <0.1 were regarded as significant.

271

272 *Correlational analysis between abundance of microbial species and central and peripheral outcomes*

273 Finally, using a Spearman correlation test we tested whether the abundance of microbial species on  
274 four taxonomic levels from the current study correlated with previously reported parameters from the  
275 same mice<sup>9</sup>. The parameters were: cognitive behaviour (Performance on Object Location Task and  
276 Morris Water Maze), fatty acid profiles in hippocampus, liver and erythrocytes and multiple metabolic  
277 outcomes (bodyweight, plasma leptin levels, inguinal fat, sum white fat). Detailed description of the  
278 methods regarding these parameters can be found in Yam et al. (2019). All correlations are shown in  
279 Figure 5, and correlations with  $p > 0.7$  are reported in the text and Supplementary Table S2 and S3.

280

## 281 **Results**

282

### 283 **3.1 Low dietary $\omega$ -6/ $\omega$ -3 ratio prevents the early-life stress induced expansion of microbiota** 284 **diversity in fecal samples**

285

286 Male mice were exposed to ELS via LBN paradigm (P2 to P9) and to an early diet (P2 – P42) with  
287 either high (15) or low (1)  $\omega$ -6 linoleic acid to  $\omega$ -3 alpha-linolenic acid ratio, and are the same cohort  
288 of mice as in our previous publication<sup>9</sup>. 16S ribosomal RNA was sequenced and analyzed from fecal  
289 samples at P21, P42 and P180 (Fig. 1A). Experimental groups are referred to as: CTL- and ELS-high;  
290 control and ELS-exposed animals that received a diet with  $\omega$ -6/ $\omega$ -3 ratio=15 and CTL- and ELS-low;  
291 control and ELS-exposed animals that received a diet with  $\omega$ -6/ $\omega$ -3 ratio=1.1 (Methods).

292

#### 293 *$\alpha$ -diversity*

294  *$\alpha$ -diversity* summarizes the distribution of taxa abundances in a given sample into a single number  
295 that depends both on species richness and evenness. For all four experimental groups, the lowest  
296 Operational Taxonomic Unit (OTU) level  *$\alpha$ -diversity* within samples was observed at P21 and  
297 increased with age (GLMM: *timepoint*  $p < 0.0001$  at a sequencing depth of 11,535 sequences; all  
298 experimental samples present at this sequencing depth) (Fig. 1B). No differences were seen in  
299 phylogenetic  *$\alpha$ -diversity* between the four experimental groups at any timepoint (P21, *condition\*diet*  
300  $F_{1,14} = 0.690$ ,  $P = 0.420$ ; P42, *condition\*diet*  $F_{1,33} = 0.389$ ,  $P = 0.537$ ; P180, *condition\*diet*  $F_{1,37} = 0.668$ ,  
301  $P = 0.419$ ).

302 Our sample size at P21 was relatively low (N=3-5 per group), and even though our  
303 methodology was able to pick up age-related changes in  *$\alpha$ -diversity* for further outcome  
304 measurements we only analyzed the P42 and P180 time points.

305

#### 306 *$\beta$ -diversity*

307 Where alpha diversity focuses on community variation within a community (sample),  *$\beta$ -diversity*  
308 quantifies (dis-)similarities in microbiota composition between samples. Analysis of the  *$\beta$ -diversity* at  
309 OTU level between samples within the experimental groups showed a main effect of condition and  
310 diet at both P42 and P180, and an interaction effect between condition and diet at P42 (Two-way  
311 ANOVA: P42, *condition*:  $F_{1,165} = 9.425$ ,  $P = 0.0025$ ; *diet*:  $F_{1,165} = 14.17$ ,  $P = 0.0002$ , *condition\*diet*  $F_{1,165}$   
312  $= 5.063$ ,  $P = 0.0258$ ; P180: *condition*:  $F_{1,187} = 16.08$ ,  $P < 0.0001$ ; *diet*  $F_{1,187} = 5.002$ ,  $P = 0.0265$ ). Further

313 post hoc testing revealed that at P42, the microbiome of animals exposed to ELS and high dietary  $\omega$ -  
314  $6/\omega$ -3 (ELS-high) animals displayed an increase in  $\beta$ -diversity as compared to the other P42-age  
315 groups (Tukey post-hoc test: ELS-high – CTL-high,  $P < 0.0001$ ; ELS-high – CTL-low,  $P < 0.0001$ ;  
316 ELS-high – ELS-low,  $P < 0.0001$ ) (Fig. 1C,D).

317 Kruskal Wallis analysis of variance of the  $\beta$ -diversity *between* experimental groups at P42 and  
318 P180 was significant (Kruskal Wallis  $p < 0.0001$  for both ages) (Supplementary Fig. 1C,D). Dunn's  
319 multiple comparison test at P42 showed that microbiota composition profile of "CTL-high versus ELS-  
320 low" is less distant than "CTL-high versus ELS-high" (Dunn's post hoc:  $p = 0.0001$ ). The composition  
321 profile of "CTL-high versus ELS-high" is more distant than "CTL-low versus CTL-high" ( $p = 0.0080$ ) and  
322 "CTL-low versus ELS-low" (Dunn's post hoc:  $p = 0.0022$ ). The microbiota composition of "ELS-low  
323 versus ELS-high" is also more distant than that of "CTL-low versus CTL-high" ( $p = 0.0178$ ) and "CTL-  
324 low versus ELS-low" ( $0.0050$ ). Dunn's multiple comparison test at P180 showed that the composition  
325 of "CTL-high versus ELS-low" was significantly less distant than "ELS-low versus ELS-high"  
326 ( $p = 0.0249$ ) and "CTL-low versus ELS-low" ( $p = 0.0011$ ). Next, the microbiota composition of "CTL-high  
327 versus ELS-high" was less distant than "ELS-low versus ELS-high" ( $p = 0.0040$ ), "CTL-low versus ELS-  
328 low" ( $p = 0.0001$ ) and "CTL-low versus ELS-high" ( $p = 0.0457$ ). Lastly, the microbiota composition of  
329 "CTL-low versus CTL-high" was less distant than "CTL-low versus ELS-low".

330 Assessment of the  $\beta$ -diversity at genus level by principal component analysis (PCA) showed no  
331 distinct clustering of the four experimental groups at P42 (Fig. 1E), nor at P180 (Fig. 1G). Similar to  
332 the Weighted UniFrac analysis, the ELS-high group showed the lowest homogeneity (i.e., the  
333 samples of ELS-high displayed the largest spread over the plot) at P42. When performing distance-  
334 based redundancy analysis (db-RDA), distinct clustering of the experimental groups was observed at  
335 P42 and P180 (Fig. 1F,H). At P42 the condition\*diet interaction explained 12,8% of the total variation  
336 (with 10,6% in the first two db-RDA axes, see Fig. 1F), this was found to be significant (ANOVA like  
337 permutation test for Redundancy Analysis;  $p = 0.018$ ). For P180 the condition\*diet interaction  
338 explained 13,9% of the total variation (with 11,9% in the first two db-RDA axes, see Fig. 1H) which  
339 was found to be significant (ANOVA like permutation test for Redundancy Analysis  $p = 0.003$ ).

340

341 **3.2 Fecal microbiota composition is affected by age, early-life stress and the  $\omega$ -6/ $\omega$ -3 PUFA**  
342 **ratio of an early diet**

343 Analysis of relative abundances at phylum, class, family and genus levels shows that the fecal  
344 microbiota composition of the experimental groups differed significantly for several bacterial taxa at  
345 both P42 (Fig. 2) and P180 (Fig. 3). All statistical differences are included in Table 2 and Table 3, and  
346 additional descriptive information on all measured bacterial species stratified per taxonomic level, age  
347 and experimental group are included in supplementary Table S4. Analysis at phylum level indicated  
348 that for both ages the fecal microbiota was dominated by three major phyla: Bacteroidetes,  
349 Firmicutes, and Verrucomicrobia, but also Proteobacteria, Deferribacteres and Actinobacteria were  
350 present (Fig. 2A). Other phyla detected in low abundance (<3%) were Candidate division TM7 (2.1%),  
351 Cyanobacteria (0.67%) and Tenericutes (1.53%) (not depicted in Fig. 2A). Analysis at genus level  
352 showed that the twenty most abundant genera for both ages were *Parasutterella*, *Bacteroides*,  
353 *Atopobium*, *Bilophila*, *Desulfovibrio*, *Allobaculum*, *Lachnospiraceae\_uncultured* and *Blautia*,  
354 *Odoribacter*, *Alloprevotella*, *Alistipes*, *RC9-gut group*, *Rikenella*, *Ruminococcaceae\_uncultured*,  
355 *Anaerotruncus* and *Incertae-sedis*, *S24-7\_uncultured*, *VadinBB60\_uncultured*, *Akkermansia* and a  
356 group with unassigned sequences (Fig. 2B).

357 Many changes were observed in the fecal microbiota composition of mice between P42 and  
358 P180 at all analyzed taxonomic levels (phylum, class, order, family, genus). At phylum level, the  
359 abundance of Bacteroidetes increased with age while Actinobacteria and Verrucomicrobia were found  
360 in lower abundances in P180 samples. At genus level, among many others, *Parasutterella* and  
361 *VadinBB60* increased and *RC9 gut group* and *Bilophila* decreased with age. All age-mediated  
362 changes and statistical vales are described in Figure 2 and Table 1.

363 Main effects for ELS and the early dietary  $\omega$ -6/ $\omega$ -3 ratio on the relative abundance were  
364 detected for bacterial groups at P42 and P180 (Fig. 3; Fig. 4; Table 2). At P42, ELS exposure  
365 decreased the abundance of *Coprococcus* and the low  $\omega$ -6/ $\omega$ -3 diet reduced the class, order and  
366 family Erysipelotrichia, Erysipelotrichales and Erysipelotrichaceae belonging to Firmicutes (Fig 3). At  
367 P180, the low  $\omega$ -6/ $\omega$ -3 diet long-lastingly reduced the genus *Coriobacteriaceae uncultured*. ELS  
368 reduced the relative abundance of the genera *RC9 gut group* and *Rikenella*, both part of the  
369 Rikenellaceae family in adulthood at P180 (Fig. 4).

370 At both ages, most significant changes in the relative abundance of the microbiota were  
371 dependent on both ELS and dietary  $\omega$ -6/ $\omega$ -3 ratio (Table 2). At P42 (Fig. 3), interaction effects were  
372 found between ELS exposure and diet for the phylum Cyanobacteria and its class and order

373 Melainabacteria and Gastranaerophilales, for which the low diet significantly increased their  
374 abundance in specifically CTL animals, while in ELS animals no differences were present dependent  
375 on the early dietary  $\omega$ -6/ $\omega$ -3 ratio. This same pattern was found for several Clostridia members;  
376 Clostridiales Family XIII, an unassigned Clostridiales taxon, *Incertae sedis*, and an uncultured *Family*  
377 *XIII* taxon. Next, interaction effects between ELS and diet were detected for the class, order, family  
378 and genus Erysipelotrichia, Erysipelotrichales and Erysipelotrichaceae and *Allobaculum*, the low  $\omega$ -  
379 6/ $\omega$ -3 diet reduced its abundance in specifically CTL animals, while for ELS animals this reduction  
380 was not significant. Lastly, an interaction effect was found for the Bacteroidetes genus *Odoribacter*,  
381 for which ELS reduced its abundance in animals fed a high  $\omega$ -6/ $\omega$ -3 diet but not in animals fed the low  
382  $\omega$ -6/ $\omega$ -3 diet.

383 At P180 (Fig. 4), an interaction between ELS and diet was found for the genus  
384 *Bifidobacterium*, relative abundance was significantly higher in ELS exposed animals fed the high  $\omega$ -  
385 6/ $\omega$ -3 diet as compared to CTL and ELS exposed animals fed the low  $\omega$ -6/ $\omega$ -3 diet. For the bacteria  
386 group *Coriobacteriaceae uncultured*, except from the reduction by the low  $\omega$ -6/ $\omega$ -3 diet for both CTL  
387 and ELS exposed animals as described above, an interaction between ELS exposure and diet was  
388 found. Next, an interaction effect was found for three members of the Rikenellaceae family. ELS  
389 exposure increased the abundance of *Alistipes* specifically in animals fed the high  $\omega$ -6/ $\omega$ -3 diet. For  
390 *RC9 gut group* and *Rikenella*, the ELS induced reduction (main effect ELS as described above), was  
391 only significant in animals fed the low  $\omega$ -6/ $\omega$ -3 diet. For the Firmicutes *VadinBB60 ambiguous taxa*  
392 and *Turicibacter* the low  $\omega$ -6/ $\omega$ -3 diet increased its abundance in CTL animals. Lastly, ELS exposure  
393 decreased the relative abundance of *Bilophila* only in animals fed the high  $\omega$ -6/ $\omega$ -3 diet. For *S24-7*  
394 *ambiguous taxa* (Bacteroidetes) an interaction effect was found between ELS and diet at P180,  
395 however post hoc testing did not reveal significant differences between the experimental groups.

396

### 397 **3.3. Correlations between bacterial taxa and peripheral and central outcome parameters within** 398 **the same mice**

399 We have recently reported that ELS exposure altered central and peripheral fatty acid profiles and  
400 impaired cognition in these animals<sup>9</sup>. Exposure to the low  $\omega$ -6/ $\omega$ -3 PUFA diet between P2 and P42  
401 was able to protect against the ELS-induced cognitive deficits in adulthood but did not affect the  
402 metabolic alterations. In order to investigate if and how alterations in the microbiota might relate to

403 these changes, we studied the correlation between several outcomes (behaviour, metabolic  
404 parameters and levels of central and peripheral fatty acid levels) and the relative abundance of  
405 bacterial groups at different taxonomic levels. All correlations are shown in Figure 5, and those with  
406  $p > 0.7$  or  $p < -0.7$  are reported in the text and supplementary Table S2 and S3.

407

#### 408 *Bacterial taxa at P42 in relation to behaviour in adulthood*

409 With regard to adult behaviour, we detected a negative correlation between the P42 levels of two  
410 related Bacteroidetes taxa *Porphyromonadaceae* and *Odoribacter* and performance on the object  
411 location task (OLT) ( $\rho = -0.7$ ,  $\rho = -0.73$  respectively) (Supplementary Fig. 2). No correlations were  
412 detected for the other parameters related to behaviour.

413

#### 414 *Bacterial taxa at P42 in relation to metabolic outcome parameters at P42*

415 The abundance of several bacterial species at P42 correlated with specific P42 metabolic outcomes  
416 (Fig. 5; Supplementary Table S2). Namely, the phylum Bacteroidetes and order Bacteroidales  
417 negatively correlated with the amount of inguinal fat ( $\rho = -0.77$  for both). Taxa of the Bacteroidetes  
418 phylum *Porphyromonadaceae* and *Odoribacter* positively correlated with bodyweight ( $\rho = 0.73$  for  
419 both). Several taxa within the Proteobacteria phylum: Enterobacteriales, Enterobacteriaceae and  
420 *Escherichia-shigella* group ( $\rho = 0.71$ ), as well as taxa within the Firmicutes phylum: Clostridiaceae 1  
421 and *Clostridium sensu stricto* 1 ( $\rho = 0.85$  for both) and *Marvinbryantia* ( $\rho = 0.78$ ) positively  
422 correlated with plasma leptin levels. The genus *Christensenella* S24-7 negatively correlated with  
423 leptin levels ( $\rho = -0.83$  and  $-0.71$  respectively). The Bacteroidetes S24-7 and S24-7 Unc. showed a  
424 negative correlation with the amount of white fat in mice ( $\rho = -0.72$  for both). There were no  
425 correlations between bacterial species at P180 and metabolic outcomes at P180.

426

#### 427 *Bacterial taxa at P42 in relation to fatty acid levels in the hippocampus, erythrocytes and liver at P42*

428 We detected multiple strong correlations between bacterial taxa and fatty acid levels in the  
429 hippocampus, erythrocytes and liver (Fig. 5; Supplementary Table S3). From the Firmicutes phylum  
430 the Peptostreptococcaceae family negatively correlated with the  $\omega$ -6/ $\omega$ -3 ratio in the hippocampus,  
431 erythrocytes and liver ( $\rho$  values of  $-0.76$ ,  $-0.71$ ,  $-0.77$ , respectively). In agreement with this,  
432 Peptostreptococcaceae positively correlated with  $\omega$ -3 levels in all three tissues ( $\rho > 0.7$  for all). The



433 Lactobacillaceae family, also from the Firmicutes phylum, positively correlated with the LA/ALA ratio  
434 in erythrocytes and liver ( $\rho = 0.73$  for both). Within the Actinobacteria phylum the *Bifidobacterium*  
435 lineage (from order, family until genus level) positively correlated with the amount of LCPUFAs in the  
436 hippocampus ( $\rho = 0.82$ ). We detected very few correlations between P180 bacterial species and  
437 fatty acid levels at P180 (Fig. 5; Supplementary Table S3)

## 438 **Discussion**

440 We have previously shown that an early dietary intervention with reduced  $\omega$ -6/ $\omega$ -3 PUFA (LA/ALA)  
441 ratio protects against the ELS-induced cognitive deficits without affecting the metabolic alterations<sup>9</sup>.  
442 While the relation between stress, nutrition and the gut microbiota has been gaining increased  
443 attention over the recent years<sup>13,32</sup>, the specific mechanisms of such dietary interventions are not well  
444 understood. Here we demonstrate that chronic ELS during the first week of life (P2 - P9) increases  
445 the phylogenetic  $\beta$ -diversity of the gut microbiota both at P42 and persistently into adulthood (P180) in  
446 animals consuming a high  $\omega$ -6/ $\omega$ -3 diet. The early diet with low  $\omega$ -6/ $\omega$ -3 ratio was able to prevent this  
447 increase in  $\beta$ -diversity at P42, when animals were still consuming the experimental diet. In addition,  
448 ELS and the diet, mostly in interaction with each other, modulate the relative abundance of bacterial  
449 groups at several taxonomic levels on the short and long-term.

450 We will next discuss the microbiota diversity and composition across age, then elaborate on  
451 the short- and long-term impact of ELS and early dietary  $\omega$ -6/ $\omega$ -3 ratio on different microbiota  
452 parameters and lastly relate the microbial taxa abundance to earlier reported central and peripheral  
453 outcome measures from the same cohort of mice<sup>9</sup>.

### 454 **The microbiota across age**

456 The phylogenetic diversity within samples ( $\alpha$ -diversity) increased with age from weaning (P21) up to  
457 adulthood and, as expected, with only a relatively small difference between P42 and P180 samples in  
458 terms of the number of detected species. This is in line with previously described total amount of  
459 species across these ages<sup>59,60</sup>, while a decrease in  $\alpha$ -diversity has been described in late adulthood  
460 or elderly which was associated with increased presence of diseases and medication<sup>61</sup>. The sample  
461 size at weaning age (P21) was relatively low, and even though the methodology that was used was  
462 reliable and sensitive enough to pick up age-related changes in  $\alpha$ -diversity (sequencing depth of over  
463 20.000 sequences for all three ages), we will further focus the discussion on our findings comparing



464 adolescent (P42) and adult (P180) microbiota composition. The composition of the gut microbiota in  
465 terms of its relative species abundance is affected by age. Both at P42 and P180, Bacteroidetes and  
466 Firmicutes are the two most abundant phyla in all experimental groups, which is in line with other  
467 rodent and human microbiota profiles<sup>62</sup>. When comparing these two ages we observed multiple  
468 changes in the composition of the fecal microbiota, mainly consisting of a reduction in the phyla  
469 Actinobacteria and Verrucomicrobia (which includes the genus *Akkermansia*) and an increase of  
470 Bacteroidetes in adulthood. In particular, in P180 samples as compared to P42 samples, we observed  
471 lower abundance of members of the phylum Actinobacteria (Coriobacteriaceae and *Enterorhabdus*) of  
472 which *Bifidobacterium* is a genus and multiple members of the Firmicutes order Clostridiales. Also we  
473 observed higher abundances of members of the phylum Proteobacteria, such as the genus  
474 *Parasutterella*, in P180 samples as compared to P42 samples. In line with our comparative analyses  
475 between ages in mice, there is evidence for age dependent changes on the microbiome from human  
476 literature. While most studies up to date aimed at comparing gut microbiota of children between 0 and  
477 2 years old with those of adults or elderly<sup>63</sup> only very few have included adolescent groups. However,  
478 based on Agans et al. (2011), in line with our findings, adolescents can easily be separated from  
479 adults based on the relative species abundance and that in particular adolescent microbiota consist of  
480 a relative lower abundance of the genus *Sutterella* and relative higher abundance of *Bifidobacterium*  
481 and *Clostridium*<sup>64,65</sup>. Further work is needed, in both rodent and human cohorts, to be able to  
482 understand the age-related changes in microbiota composition in more detail and if and how each age  
483 group might be differently sensitive to stress exposure, diet or other environmental challenges.

484

#### 485 **Short and long-term impact of early-life stress and early diet on microbiota composition**

486 We will here first discuss the effects of ELS on microbiota  $\alpha$ - and  $\beta$ -diversity and species abundance  
487 and thereafter the specific effects of the different dietary  $\omega$ -6/ $\omega$ -3 ratio on these parameters as well as  
488 the interaction of  $\omega$ -6/ $\omega$ -3 ratio with ELS exposure.

489

#### 490 *Short and long-term impact of early-life stress on microbiota composition*

491 In this study, ELS exposure did not affect  $\alpha$ -diversity at P42 or P180. Similar to our data, a multi-hit  
492 ELS model did not alter  $\alpha$ -diversity in adult mice<sup>66</sup>, while our findings are in contrast with the ELS-  
493 reduction in  $\alpha$ -diversity reported in rats, via the limited bedding and nesting (LBN) model at weaning<sup>67</sup>

494 or maternal separation (MS) in adulthood<sup>68</sup>. Thus, type of ELS model, outcome age and species seem  
495 to greatly impact the effects of early life adversity on the microbial  $\alpha$ -diversity. In general, a less  
496 diverse microbiome is thought to be less resilient to external perturbations due to the loss of functional  
497 redundancy of the present species, therefore possibly less healthy<sup>69</sup>. However, whether health  
498 outcomes are positive or negative likely depends on the actual composition of the community.

499 The phylogenetic  $\beta$ -diversity distances between samples at OTU-level in ELS-exposed  
500 animals fed the high  $\omega$ -6/ $\omega$ -3-high diet, were strongly expanded both on short- and long-term, at P42  
501 and P180. This suggests greater compositional differences between samples within the ELS group,  
502 meaning that the microbiota of ELS exposed mice are phylogenetically more apart from each other  
503 when compared to those of CTL mice. To our knowledge, this is the first time that such expansion of  
504  $\beta$ -diversity is reported after ELS on the long-term and might suggest an aberrant microbial state,  
505 however the exact functional implications of such state remain to be understood<sup>70,71</sup>.

506 Few bacterial species were affected by ELS regardless of the early dietary  $\omega$ -6/ $\omega$ -3 ratio. At  
507 P42, ELS reduced the abundance of the genus *Coprococcus*, part of the Lachnospiraceae family.  
508 This is in line with the reduction in *Coprococcus* found at weaning in ELS exposed rats, via the LBN  
509 paradigm<sup>67</sup>. Lachnospiraceae and *Coprococcus* have been defined as major butyrate producing  
510 bacterial groups in both rodents and humans<sup>72,73</sup>, which suggests that ELS could affect butyrate levels  
511 via affecting these taxa. In adulthood (P180) the genera *RC9 gut group* and *Rikenella*, both part of the  
512 *Rikenellaceae* family and Bacteroidetes phylum were lastingly reduced by ELS. Similarly, MS in rats  
513 has been shown to reduce abundance of *Rikenella*, which also correlated with stress-induced  
514 corticosterone plasma levels in MS-exposed rats<sup>42</sup>. *Rikenella* is a well-known sugar fermenter and it  
515 has been suggested that stress can reduce the availability of sugars in the gut<sup>74</sup> possibly leading to a  
516 decrease of bacteria involved in processing of sugars.

517 In summary, ELS during the first week of life does not affect  $\alpha$ -diversity but leads to long-term  
518 effects on  $\beta$ -diversity. The expansion of the phylogenetic  $\beta$ -diversity between samples has been  
519 associated with an unhealthy or aberrant gut microbial state. Moreover, ELS affects the relative  
520 abundance of *Coprococcus* at P42 and *RC9 gut group* and *Rikenella* at P180. The implications of  
521 these specific alterations within the relative abundance of bacterial groups are not well understood but  
522 nevertheless can impact the functionality of the gut microbiota.

523

524 *Effect of the early dietary  $\omega$ -6/ $\omega$ -3 ratio and its interaction with early-life stress on the short and long*  
525 *term*

526 We have previously reported, within this same cohort, a rescue effect of the low  $\omega$ -6/ $\omega$ -3 diet on the  
527 ELS-induced cognitive impairments as well as alterations in hippocampal brain plasticity, namely a  
528 reversal of the ELS-reduction in adult neurogenesis and the ELS-increase in the phagocytic marker of  
529 microglia, without affecting the ELS-mediated metabolic changes<sup>9</sup>. This allows us to not solely  
530 discuss effects of ELS and early diet on the microbiota, but also relate the observed changes to  
531 earlier described ELS-induced alterations, which were performed within the same mice cohort.

532 We found that the ELS-induced aberrant state of the phylogenetic  $\beta$ -diversity, the increased  
533 distances between animals fed a high  $\omega$ -6/ $\omega$ -3 diet early in life, was not present in animals that were  
534 consuming a low  $\omega$ -6/ $\omega$ -3 diet (as measured at P42). Because, as earlier described, the low  $\omega$ -6/ $\omega$ -3  
535 diet protected against the ELS-induced central deficits in cognition and hippocampal plasticity in  
536 adulthood, it is tempting to speculate that this early modulation of  $\beta$ -diversity by dietary  $\omega$ -6/ $\omega$ -3 ratio  
537 could possibly modulate early developmental processes that contribute to the long-term ELS-induced  
538 brain-related outcomes<sup>30,75</sup>. Interestingly the effect of the diet on  $\beta$ -diversity is no longer present in  
539 adulthood. This is in line with the idea that diet mostly directly impacts microbiota. For example, it has  
540 been demonstrated in clinical trials that washout periods after dietary supplementation of DHA mostly  
541 revert DHA-mediated microbiota changes<sup>76,77</sup> and that dietary patterns and fatty acid intake can be  
542 directly linked to the composition of the gut microbiota<sup>78,79</sup>. Similarly, in a preclinical setting, as  
543 mentioned before, it has been reported that life-long supplementation of  $\omega$ -3 LCPUFAs can restore  
544 part of the disturbed gut microbiota composition of MS-exposed adult female rats, even though in this  
545 study no changes in  $\beta$ -diversity were reported<sup>42</sup>.

546 When looking at the relative abundance of microbial species, we see some immediate and  
547 long-lasting effects of the diet. Mice fed the low  $\omega$ -6/ $\omega$ -3 ratio diet from P2-P42, exhibited a reduction  
548 in *Erysipelotrichia* lineage down to the *Erysipelotrichaceae* family (Firmicutes) when compared to  
549 mice fed the high  $\omega$ -6/ $\omega$ -3 ratio diet. These taxa have been reported to be increased in obese  
550 individuals notoriously consuming diets with excess of  $\omega$ -6 fatty acids<sup>80</sup>, pointing towards the idea that  
551 dietary  $\omega$ -6/ $\omega$ -3 ratio is an important modulator of these specific bacteria and their balance. Similarly,  
552  $\omega$ -3 (LC)PUFA supplementation has been shown to lead to a decrease of the Firmicutes phylum<sup>33,81,82</sup>

553 and restoration of the Firmicutes/Bacteroidetes ratio, often reported to be higher under pathological  
554 conditions such as obesity and inflammatory bowel syndrome (IBS)<sup>83,84</sup>.  
555 Next to the independent effects of ELS and dietary  $\omega$ -6/ $\omega$ -3 ratio, their interaction is particularly  
556 interesting to gain further insight in how the diet might exert its protective effect on the ELS-induced  
557 deficits. For example, directly after the end of the dietary intervention at P42, specifically control mice  
558 fed the low  $\omega$ -6/ $\omega$ -3 diet exhibited an increased abundance of several Clostridia members when  
559 compared to those fed the diet with the high  $\omega$ -6/ $\omega$ -3 ratio. These taxa belong to the phylum  
560 Firmicutes and order Clostridiales that are known for their involvement in the production of  
561 butyrate<sup>85,86</sup>. Such modulation is in line with the fact that  $\omega$ -3 fatty acid supplementation can indeed  
562 lead to increased bacterial derived butyrate<sup>72,77</sup>. Short-chain fatty acids (SCFA) such as butyrate,  
563 propionate and acetate are bacterial-derived metabolites of fibers and carbohydrate that have been  
564 suggested to be key for mental health<sup>87</sup>. For example by increasing central brain derived neurotrophic  
565 factor (BDNF) production<sup>88,89</sup> and modulation of microglial maturation and functionality<sup>90</sup>. As  
566 mentioned above, the low  $\omega$ -6/ $\omega$ -3 diet was able to prevent ELS-induced alterations in hippocampal  
567 plasticity including microglial morphology and phagocytic capacity<sup>9</sup>, raising the question if this could  
568 possibly be related to an increase in bacterial-derived butyrate by the diet in ELS exposed animals  
569 specifically. Next, ELS exposure reduced the abundance of the Bacteroidetes genus *Odoribacter* in  
570 animals fed the high  $\omega$ -6/ $\omega$ -3 diet but not in animals fed the low  $\omega$ -6/ $\omega$ -3 diet. *Odoribacter* is a known  
571 producer of acetate, propionate and butyrate<sup>91</sup>, decreased *Odoribacter* may affect host inflammation  
572 via reduced SCFA availability. It will be interesting to see in follow-up studies whether indeed our  
573 conditions lead to an altered levels of SCFAs and in particular butyrate.

574 Summarizing, we found that low dietary  $\omega$ -6/ $\omega$ -3 ratio prevents the ELS-induced expansion of  
575 the phylogenetic  $\beta$ -diversity. In addition, the dietary  $\omega$ -6/ $\omega$ -3 ratio significantly impacted the presence  
576 of microbes in the gut while animals were still consuming the experimental diet, mostly in interaction  
577 with ELS exposure. Many of these changes are in line with literature showing beneficial effects of  
578 dietary  $\omega$ -3 supplementation on brain and metabolism<sup>40,92</sup> and suggest that the diet induced protective  
579 effects might be partly modulated by the observed changes in microbiota. We hypothesize that  
580 lowering  $\omega$ -6/ $\omega$ -3 early in life, via lowering dietary LA/ALA ratio, contributes to a stable and diverse  
581 microbiota thereby affecting sensitive developmental processes that could impact the later-life health  
582 status.

583            Important to note is that within the current study, all animals were on a life-long synthetic diet,  
584 enabling us to control for the source and proportion of its ingredients. Such synthetic diets, also  
585 referred to as “refined”, contain mostly insoluble fibers such as cellulose (Supplementary Table S4),  
586 which distinguishes it from the regular chow diets containing both soluble and insoluble fibers. These  
587 dietary conditions likely impact microbiota composition since distinct bacterial species are involved in  
588 the fermentation of soluble versus insoluble fibers<sup>93,94</sup>. While this does not affect the differences  
589 observed between groups in the current study as all experimental groups were exposed to synthetic  
590 diet, it is important to bare this in mind when comparing the current findings to existing literature<sup>95</sup>.

591

592 *Abundance of microbiota species in relation to central and peripheral outcomes*

593 We studied how the bacterial changes correlate with the previously published ELS- and diet-mediated  
594 differences in cognitive abilities, metabolic alterations and central and peripheral fatty acid profiles  
595 analyzed in this same cohort<sup>9</sup>. As mentioned in section “*Short and long-term impact of early-life stress*  
596 *on microbiota composition*” we found a negative correlation between *adult* performance on a spatial  
597 memory task and the levels of Bacteroidetes family *Porphyromonadaceae* and its genus *Odoribacter*  
598 *at P42* and not at P180. Similarly, an increased abundance in both taxa have been described in aged  
599 mice<sup>96</sup> and specifically *Porphyromonadaceae* has been shown to be negatively correlated with  
600 cognitive dysfunction in humans<sup>97,98</sup>. Suggesting that a dysregulation of these taxa might be key in  
601 modulating cognitive functions. We have previously reported that ELS exposure leads to a life-long  
602 reduction in white fat mass and circulating leptin<sup>99</sup>, while these ELS-induced effects were not  
603 modulated by the diet<sup>9</sup>. When studying the correlation of the bacterial profile with the metabolic  
604 outcomes (body weight, fat mass and leptin) we found a positive correlation of *Porphyromonadaceae*  
605 and *Odoribacter* with bodyweight at P42, which is in line with a previous report showing that their  
606 abundance is increased in HFD-exposed mice<sup>100</sup>. In addition, the phylum Bacteroidetes and multiple  
607 of its taxa (e.g. *S24-7*), were negatively correlated with the amount of white fat mass. Notably, an  
608 unidentified taxon from the *S24-7* family has been reported to be affected by early life  
609 supplementation of synbiotics that protected against diet-induced obesity in adult mice<sup>101</sup>. Indeed high  
610 levels of Bacteroidetes and some of its taxa are associated with a healthy non-Western diet while  
611 lower levels are associated with a Western-style diet<sup>32,102</sup>. Finally, there was a positive correlation  
612 between several taxa within the Proteobacteria phylum and plasma leptin levels. Importantly, changes

613 in the Proteobacteria have been associated with HFD in mice and humans, where leptin levels are  
614 dysregulated as well<sup>79,80,103</sup>. Also, Bacteroidetes *S24-7-ambiguous taxa* and the Firmicutes genus  
615 *Christensenella* were negatively correlated with plasma leptin, both associated with reduction in body  
616 weight or adiposity in mice<sup>101,104</sup>, suggesting that these bacteria might be particularly sensitive to  
617 conditions with altered leptin and fat mass. Lastly, we found multiple strong correlations between  
618 bacterial species and specific fatty acid levels in the hippocampus, liver and erythrocytes (Fig. 5;  
619 Supplementary Table S3). To name a few examples, there was a negative correlation between the  
620 P42 hippocampal, liver and erythrocyte  $\omega$ -6/ $\omega$ -3 ratio and the relative abundance of  
621 Peptostreptococcaceae (Firmicutes) at P42. In agreement, Peptostreptococcaceae positively  
622 correlated with  $\omega$ -3 levels in all three tissues. Interestingly a life-long  $\omega$ -3 PUFA supplementation  
623 starting prenatally lead to decreased levels of Peptostreptococcaceae when compared to chow-fed or  
624  $\omega$ -3 deficient mice<sup>105</sup>. Such discrepancy is mostly likely due to the length and type of the dietary  
625 intervention. Next, the *Bifidobacteria*, which has been established to be increased by diets high in  $\omega$ -3  
626 fatty acids<sup>77,105</sup>, correlated with the amount of hippocampal PUFAs. Several positive functions have  
627 been attributed to *Bifidobacteria* such as degradation of non-digestible carbohydrates, production of  
628 vitamin B, antioxidants, stimulation of the immune system, and increasing butyrate levels via cross-  
629 feeding<sup>106,107</sup>. While the above-mentioned relations are of course of descriptive nature, they give us a  
630 lead for future investigations to better understand which processes might be most impacted by  
631 microbiota changes and via which routes the microbiota changes could be involved in the observed  
632 ELS and diet induced effects.

633

634 In conclusion, we show that exposure to ELS via the LBN paradigm during the first postnatal week  
635 and the  $\omega$ -6/ $\omega$ -3 ratio of the early diet from P2-P42 affect the gut microbiota of male mice. These data  
636 give novel insights in the complex interaction between ELS, early dietary  $\omega$ -3 availability and the gut  
637 microbiota across ages and provide a basis for i) future studies addressing the causal relationship  
638 between the alterations in microbiota, the ELS-induced deficits and diet ii) as well as for non-invasive  
639 (nutritional) interventions targeting the microbiota to protect against and/or reverse the ELS-induced  
640 deficits.

641

642 **Data availability statement**

643 The data that support the findings of this study are openly available in “figshare” at  
644 <https://doi.org/10.6084/m9.figshare.16748824.v1>

645

#### 646 **Conflict of interest**

647 Authors ST, MM, JK and LS are employed by Danone Nutricia Research

648

#### 649 **Author contributions**

650 KR analyzed the data, prepared the figures and wrote the manuscript. ST analyzed the data and  
651 prepared the figures. KY, LS and AK conceptualized the study and KY performed the mouse-related  
652 experimental work. MM contributed to correlation analysis and discussion interpretation. AK  
653 supervised this study and reviewed and edited the manuscript. All authors contributed to editing of the  
654 manuscript.

655

#### 656 **Funding**

657 This study was funded in part by Danone Nutricia Research

658

#### 659 **Acknowledgement**

660 We would like to thank H. de Weerd for her contribution to the statistical analysis and P. van Leeuwen  
661 for his assistance with interpretation of the data.



662 **References**

663

- 664 1. Nelson, C. A., Bhutta, Z. A., Burke Harris, N., Danese, A. & Samara, M. Adversity in childhood  
665 is linked to mental and physical health throughout life. *Br. Med. J.* (2020).  
666 doi:10.1136/bmj.m3048
- 667 2. Bradford, K. *et al.* Association between early adverse life events and irritable bowel syndrome.  
668 *Clin. Gastroenterol. Hepatol.* **10**, 385-90.e1–3 (2012).
- 669 3. Nemeroff, C. B. Paradise Lost: The Neurobiological and Clinical Consequences of Child  
670 Abuse and Neglect. *Neuron* **89**, 892–909 (2016).
- 671 4. Barreau, F., Ferrier, L., Fioramonti, J. & Bueno, L. New Insights in the Etiology and  
672 Pathophysiology of Irritable Bowel Syndrome: Contribution of Neonatal Stress Models. *Pediatr.*  
673 *Res.* 2007 **623** **62**, 240–245 (2007).
- 674 5. Rice, C. J., Sandman, C. A., Lenjavi, M. R. & Baram, T. Z. A novel mouse model for acute and  
675 long-lasting consequences of early life stress. *Endocrinology* **149**, 4892–4900 (2008).
- 676 6. Walker, C.-D. *et al.* Chronic early life stress induced by limited bedding and nesting (LBN)  
677 material in rodents: critical considerations of methodology, outcomes and translational  
678 potential. *Stress* **20**, 421–448 (2017).
- 679 7. Naninck, E. F. G. *et al.* Chronic early life stress alters developmental and adult neurogenesis  
680 and impairs cognitive function in mice. *Hippocampus* **25**, 309–328 (2015).
- 681 8. Yam, K. Y. *et al.* Exposure to chronic early-life stress lastingly alters the adipose tissue, the  
682 leptin system and changes the vulnerability to western-style diet later in life in mice.  
683 *Psychoneuroendocrinology* **77**, 186–195 (2017).
- 684 9. Yam, K.-Y. *et al.* Increasing availability of  $\omega$ -3 fatty acid in the early-life diet prevents the early-  
685 life stress-induced cognitive impairments without affecting metabolic alterations. *FASEB J.* **33**,  
686 5729–5740 (2019).
- 687 10. Wopereis, H., Oozeer, R., Knipping, K., Belzer, C. & Knol, J. The first thousand days -  
688 intestinal microbiology of early life: establishing a symbiosis. *Pediatr. Allergy Immunol.* **25**,  
689 428–438 (2014).
- 690 11. Wang, S. *et al.* Targeting the gut microbiota to influence brain development and function in  
691 early life. *Neuroscience and Biobehavioral Reviews* **95**, 191–201 (2018).



- 692 12. Collins, S. M., Surette, M. & Bercik, P. The interplay between the intestinal microbiota and the  
693 brain. *Nat. Rev. Microbiol.* **10**, 735 (2012).
- 694 13. Cryan, J. F. *et al.* The Microbiota-Gut-Brain Axis. *Physiol. Rev.* **99**, 1877–2013 (2019).
- 695 14. O, A. *et al.* Gut microbiota determines the social behavior of mice and induces metabolic and  
696 inflammatory changes in their adipose tissue. *NPJ biofilms microbiomes* **7**, (2021).
- 697 15. Jiang, H. *et al.* Altered fecal microbiota composition in patients with major depressive disorder.  
698 *Brain. Behav. Immun.* **48**, 186–194 (2015).
- 699 16. Kelly, J. R., Keane, V. O., Cryan, J. F., Clarke, G. & Dinan, T. G. Mood and Microbes: Gut to  
700 Brain Communication in Depression. *Gastroenterol. Clin. North Am.* **48**, 389–405 (2019).
- 701 17. I, L., D, G., O, K. & E, E. Role of Tryptophan in Microbiota-Induced Depressive-Like Behavior:  
702 Evidence From Tryptophan Depletion Study. *Front. Behav. Neurosci.* **13**, (2019).
- 703 18. Valles-Colomer, M. *et al.* The neuroactive potential of the human gut microbiota in quality of  
704 life and depression. *Nat. Microbiol.* **4**, 623–632 (2019).
- 705 19. Berding, K. *et al.* A specific dietary fibre supplementation improves cognitive performance-an  
706 exploratory randomised, placebo-controlled, crossover study. *Psychopharmacology (Berl)*.  
707 **238**, 149–163 (2021).
- 708 20. Dabke, K., Hendrick, G. & Devkota, S. The gut microbiome and metabolic syndrome. *J. Clin.*  
709 *Investig.* **129**, 4050–4057 (2019).
- 710 21. Tamburini, S., Shen, N., Wu, H. C. & Clemente, J. C. The microbiome in early life: implications  
711 for health outcomes. *Nat. Med.* **22**, 713–722 (2016).
- 712 22. Frankiensztajn, L. M., Elliott, E. & Koren, O. The microbiota and the hypothalamus-pituitary-  
713 adrenocortical (HPA) axis, implications for anxiety and stress disorders. *Curr. Opin. Neurobiol.*  
714 **62**, 76–82 (2020).
- 715 23. Borre, Y. E. *et al.* Microbiota and neurodevelopmental windows: implications for brain  
716 disorders. *Trends Mol. Med.* **20**, 509–518 (2014).
- 717 24. Rincel, M. & Darnaudéry, M. Maternal separation in rodents: a journey from gut to brain and  
718 nutritional perspectives. *Proc. Nutr. Soc.* **79**, 113–132 (2020).
- 719 25. O'Mahony, S. M., Hyland, N. P., Dinan, T. G. & Cryan, J. F. Maternal separation as a model of  
720 brain-gut axis dysfunction. *Psychopharmacol. 2010 2141* **214**, 71–88 (2010).
- 721 26. Bailey, M. T. & Coe, C. L. Maternal separation disrupts the integrity of the intestinal microflora

- 722 in infant rhesus monkeys. *Dev. Psychobiol.* **35**, 146–55 (1999).
- 723 27. O'Mahony, S. M. *et al.* Early Life Stress Alters Behavior, Immunity, and Microbiota in Rats:  
724 Implications for Irritable Bowel Syndrome and Psychiatric Illnesses. *Biol. Psychiatry* **65**, 263–  
725 267 (2009).
- 726 28. De Palma, G. *et al.* Microbiota and host determinants of behavioural phenotype in maternally  
727 separated mice. *Nat. Commun.* **6**, 7735 (2015).
- 728 29. Moussaoui, N. *et al.* Limited Nesting Stress Alters Maternal Behavior and In Vivo Intestinal  
729 Permeability in Male Wistar Pup Rats. *PLoS One* **11**, e0155037 (2016).
- 730 30. Codagnone, M. G. *et al.* Programming Bugs: Microbiota and the Developmental Origins of  
731 Brain Health and Disease. *Biol. Psychiatry* (2018). doi:10.1016/J.BIOPSYCH.2018.06.014
- 732 31. de Weerth, C. Do bacteria shape our development? Crosstalk between intestinal microbiota  
733 and HPA axis. *Neurosci. Biobehav. Rev.* **83**, 458–471 (2017).
- 734 32. Sandhu, K. V. *et al.* Feeding the microbiota-gut-brain axis: diet, microbiome, and  
735 neuropsychiatry. *Transl. Res.* **179**, 223–244 (2017).
- 736 33. Costantini, L., Molinari, R., Farinon, B. & Merendino, N. Impact of Omega-3 Fatty Acids on the  
737 Gut Microbiota. *Int. J. Mol. Sci.* (2017). doi:10.3390/ijms18122645
- 738 34. Watson, H. *et al.* A randomised trial of the effect of omega-3 polyunsaturated fatty acid  
739 supplements on the human intestinal microbiota. *Gut* gutjnl-2017-314968 (2017).  
740 doi:10.1136/gutjnl-2017-314968
- 741 35. Simopoulos, A. P. Evolutionary Aspects of Diet: The Omega-6/Omega-3 Ratio and the Brain.  
742 *Mol. Neurobiol.* **44**, 203–215 (2011).
- 743 36. Blasbalg, T. L., Hibbeln, J. R., Ramsden, C. E., Majchrzak, S. F. & Rawlings, R. R. Changes in  
744 consumption of omega-3 and omega-6 fatty acids in the United States during the 20th century  
745 1-3. doi:10.3945/ajcn.110.006643
- 746 37. Sakayori, N. *et al.* Maternal Nutritional Imbalance between Linoleic Acid and Alpha-Linolenic  
747 Acid Increases Offspring's Anxious Behavior with a Sex-Dependent Manner in Mice. *Tohoku J*  
748 *Exp Med* 31–37 (2016). doi:10.1620/tjem.240.31.Correspondence
- 749 38. Janssen, C. I. F. *et al.* Impact of dietary n-3 polyunsaturated fatty acids on cognition, motor  
750 skills and hippocampal neurogenesis in developing C57BL/6J mice. *J. Nutr. Biochem.* **26**, 24–  
751 35 (2015).

- 752 39. Provensi, G. *et al.* Preventing adolescent stress-induced cognitive and microbiome changes  
753 by diet. *PNAS* **116**, 9644–9651 (2019).
- 754 40. Pusceddu, M. M. *et al.* n-3 PUFAs have beneficial effects on anxiety and cognition in female  
755 rats: Effects of early life stress. *Psychoneuroendocrinology* **58**, 79–90 (2015).
- 756 41. Spencer, S. J., Korosi, A., Layé, S., Shukitt-Hale, B. & Barrientos, R. M. Food for thought: how  
757 nutrition impacts cognition and emotion. *npj Sci. Food* **1**, 7 (2017).
- 758 42. Pusceddu, M. M. *et al.* N-3 polyunsaturated fatty acids (PUFAs) reverse the impact of early-life  
759 stress on the gut microbiota. *PLoS One* **10**, 1–13 (2015).
- 760 43. Reeves, P. G., Nielsen, F. H. & Fahey, G. C. AIN-93 Purified Diets for Laboratory Rodents:  
761 Final Report of the American Institute of Nutrition Ad Hoc Writing Committee on the  
762 Reformulation of the AIN-76A Rodent Diet. *J. Nutr.* **123**, 1939–1951 (1993).
- 763 44. Reeves, P., Nielsen, F. & Jr, F. G. AIN-93 purified diets for laboratory rodents: final report of  
764 the American Institute of Nutrition ad hoc writing committee on the reformulation of the AIN-  
765 76A rodent diet. *J. Nutr.* **123**, 1939–1951 (1993).
- 766 45. Klindworth, A. *et al.* Evaluation of general 16S ribosomal RNA gene PCR primers for classical  
767 and next-generation sequencing-based diversity studies. *Nucleic Acids Res.* **41**, e1 (2013).
- 768 46. Caporaso, J. G. *et al.* Ultra-high-throughput microbial community analysis on the Illumina  
769 HiSeq and MiSeq platforms. *ISME J.* **6**, 1621–4 (2012).
- 770 47. Caporaso, J. G. *et al.* QIIME allows analysis of high-throughput community sequencing data.  
771 *Nat. Methods* **7**, 335–6 (2010).
- 772 48. Edgar, R. C. Search and clustering orders of magnitude faster than BLAST. *Bioinformatics* **26**,  
773 2460–2461 (2010).
- 774 49. Cole, J. R. *et al.* The Ribosomal Database Project: improved alignments and new tools for  
775 rRNA analysis. *Nucleic Acids Res.* **37**, D141-5 (2009).
- 776 50. Pruesse, E. *et al.* SILVA: a comprehensive online resource for quality checked and aligned  
777 ribosomal RNA sequence data compatible with ARB. *Nucleic Acids Res.* **35**, 7188–7196  
778 (2007).
- 779 51. Haas, B. J. *et al.* Chimeric 16S rRNA sequence formation and detection in Sanger and 454-  
780 pyrosequenced PCR amplicons. *Genome Res.* **21**, 494–504 (2011).
- 781 52. Price, M. N., Dehal, P. S. & Arkin, A. P. FastTree 2 – Approximately Maximum-Likelihood

- 782 Trees for Large Alignments. *PLoS One* **5**, e9490 (2010).
- 783 53. Lozupone, C. & Knight, R. UniFrac: a new phylogenetic method for comparing microbial  
784 communities. *Appl. Environ. Microbiol.* **71**, 8228–35 (2005).
- 785 54. Lozupone, C., Hamady, M. & Knight, R. UniFrac--an online tool for comparing microbial  
786 community diversity in a phylogenetic context. *BMC Bioinformatics* **7**, 371 (2006).
- 787 55. Hildebrand, F. *et al.* Inflammation-associated enterotypes, host genotype, cage and inter-  
788 individual effects drive gut microbiota variation in common laboratory mice. *Genome Biol.* **14**,  
789 R4 (2013).
- 790 56. Rao, C. R. A review of canonical coordinates and an alternative to correspondence analysis  
791 using Hellinger distance. *Qüestiió* **19**, (1995).
- 792 57. Legendre, P., Oksanen, J. & ter Braak, C. J. F. Testing the significance of canonical axes in  
793 redundancy analysis. *Methods Ecol. Evol.* **2**, 269–277 (2011).
- 794 58. Storey, J. D. A direct approach to false discovery rates. *J. R. Stat. Soc. Ser. B (Statistical*  
795 *Methodol.* **64**, 479–498 (2002).
- 796 59. Yatsunencko, T. *et al.* Human gut microbiome viewed across age and geography. *Nature* **486**,  
797 222–227 (2012).
- 798 60. Flemer, B. *et al.* Fecal microbiota variation across the lifespan of the healthy laboratory rat.  
799 *Gut Microbes* **8**, 428–439 (2017).
- 800 61. Leite, G. *et al.* Age and the aging process significantly alter the small bowel microbiome. *Cell*  
801 *Rep.* **36**, 109765 (2021).
- 802 62. Nguyen, T. L. A., Vieira-Silva, S., Liston, A. & Raes, J. How informative is the mouse for  
803 human gut microbiota research? *Dis. Model. Mech.* **8**, 1–16 (2015).
- 804 63. O'Toole, P. W. & Claesson, M. J. Gut microbiota: Changes throughout the lifespan from  
805 infancy to elderly. *Int. Dairy J.* **20**, 281–291 (2010).
- 806 64. Agans, R. *et al.* Distal gut microbiota of adolescent children is different from that of adults.  
807 *FEMS Microbiol. Ecol.* **77**, 404–412 (2011).
- 808 65. Hopkins, M. J., Sharp, R. & Macfarlane, G. T. Age and disease related changes in intestinal  
809 bacterial populations assessed by cell culture, 16S rRNA abundance, and community cellular  
810 fatty acid profiles. *Gut* **48**, 198–205 (2001).
- 811 66. Rincel, M. *et al.* Multi-hit early life adversity affects gut microbiota, brain and behavior in a sex-

- 812 dependent manner. *Brain. Behav. Immun.* (2019). doi:10.1016/j.bbi.2019.03.006
- 813 67. Moussaoui, N. *et al.* Chronic Early-life stress in rat pups alters basal corticosterone, intestinal  
814 permeability, and fecal microbiota at weaning: Influence of Sex. *J Neurogastroenterol Motil* **23**,  
815 (2017).
- 816 68. Rincel, M. *et al.* Pharmacological restoration of gut barrier function in stressed neonates  
817 partially reverses long-term alterations associated with maternal separation.  
818 *Psychopharmacology (Berl)*. **236**, 1583–1596 (2019).
- 819 69. Lozupone, C. A., Stombaugh, J. I., Gordon, J. I., Jansson, J. K. & Knight, R. Diversity, stability  
820 and resilience of the human gut microbiota. *Nature* **489**, 220–230 (2012).
- 821 70. Koren, O. *et al.* Host Remodeling of the Gut Microbiome and Metabolic Changes during  
822 Pregnancy. *Cell* **150**, 470–480 (2012).
- 823 71. Zijlmans, M. A. C., Korpela, K., Riksen-Walraven, J. M., de Vos, W. M. & de Weerth, C.  
824 Maternal prenatal stress is associated with the infant intestinal microbiota.  
825 *Psychoneuroendocrinology* **53**, 233–245 (2015).
- 826 72. Louis, P. & Flint, H. J. Formation of propionate and butyrate by the human colonic microbiota.  
827 *Environ. Microbiol.* **19**, 29–41 (2017).
- 828 73. Zhang, J. *et al.* Beneficial effect of butyrate-producing Lachnospiraceae on stress-induced  
829 visceral hypersensitivity in rats. *J. Gastroenterol. Hepatol.* **34**, 1368–1376 (2019).
- 830 74. Mayer, E. A. The neurobiology of stress and gastrointestinal disease. *Gut* **47**, 861–869 (2000).
- 831 75. Jain, N. The early life education of the immune system: Moms, microbes and (missed)  
832 opportunities. *Gut Microbes* **00**, 1–20 (2020).
- 833 76. Noriega, B. S., Sanchez-Gonzalez, M. A., Salyakina, D. & Coffman, J. Understanding the  
834 Impact of Omega-3 Rich Diet on the Gut Microbiota. *Case Rep. Med.* **2016**, 3089303 (2016).
- 835 77. Watson, H. *et al.* A randomised trial of the effect of omega-3 polyunsaturated fatty acid  
836 supplements on the human intestinal microbiota. *Gut* **67**, 1974–1983 (2018).
- 837 78. Claesson, M. J. *et al.* Gut microbiota composition correlates with diet and health in the elderly.  
838 *Nature* **488**, 178–184 (2012).
- 839 79. Wu, G. D. *et al.* Linking long-term dietary patterns with gut microbial enterotypes. *Science* **334**,  
840 105–8 (2011).
- 841 80. Graham, C., Mullen, A. & Whelan, K. Obesity and the gastrointestinal microbiota: a review of

- 842 associations and mechanisms. *Nutr. Rev.* **73**, 376–385 (2015).
- 843 81. Balfegó, M. *et al.* Effects of sardine-enriched diet on metabolic control, inflammation and gut  
844 microbiota in drug-naïve patients with type 2 diabetes: a pilot randomized trial. *Lipids Health*  
845 *Dis.* **15**, 78 (2016).
- 846 82. Yu, H.-N. *et al.* Effects of Fish Oil with a High Content of n-3 Polyunsaturated Fatty Acids on  
847 Mouse Gut Microbiota. *Arch. Med. Res.* **45**, 195–202 (2014).
- 848 83. Santoru, M. L. *et al.* Cross sectional evaluation of the gut-microbiome metabolome axis in an  
849 Italian cohort of IBD patients OPEN. doi:10.1038/s41598-017-10034-5
- 850 84. Turnbaugh, P. J. *et al.* An obesity-associated gut microbiome with increased capacity for  
851 energy harvest. *Nature* **444**, 1027–1031 (2006).
- 852 85. Chai, L.-J. *et al.* Zooming in on Butyrate-Producing Clostridial Consortia in the Fermented  
853 Grains of Baijiu via Gene Sequence-Guided Microbial Isolation. *Front. Microbiol.* **10**, 1397  
854 (2019).
- 855 86. Pichler, M. J. *et al.* Butyrate producing colonic Clostridiales metabolise human milk  
856 oligosaccharides and cross feed on mucin via conserved pathways. *Nat. Commun.* **11**, 1–15  
857 (2020).
- 858 87. Jiang, H. *et al.* Altered fecal microbiota composition in patients with major depressive disorder.  
859 *Brain. Behav. Immun.* **48**, 186–194 (2015).
- 860 88. Barichello, T. *et al.* Sodium Butyrate Prevents Memory Impairment by Re-establishing BDNF  
861 and GDNF Expression in Experimental Pneumococcal Meningitis. *Mol. Neurobiol.* **52**, 734–  
862 740 (2015).
- 863 89. Bercik, P. *et al.* The intestinal microbiota affect central levels of brain-derived neurotropic  
864 factor and behavior in mice. *Gastroenterology* **141**, 599–609 (2011).
- 865 90. Erny, D. *et al.* Host microbiota constantly control maturation and function of microglia in the  
866 CNS. *Nat. Neurosci.* **18**, 965–977 (2015).
- 867 91. Göker, M. *et al.* Complete genome sequence of odoribacter splanchnicus type strain (1651/6  
868 T). *Stand. Genomic Sci.* **4**, 200–209 (2011).
- 869 92. Ong, I. M. *et al.* Gut microbiome populations are associated with structure-specific changes in  
870 white matter architecture. *Transl. Psychiatry* **8**, 6 (2018).
- 871 93. Kuo, S.-M. The interplay between fiber and the intestinal microbiome in the inflammatory

- 872 response. *Adv. Nutr.* **4**, 16–28 (2013).
- 873 94. Warden, C. H. & Fisler, J. S. Comparisons of diets used in animal models of high fat feeding.  
874 *Cell Metab.* **7**, 277 (2008).
- 875 95. Morrison, K. E., Jašarević, E., Howard, C. D. & Bale, T. L. It's the fiber, not the fat: Significant  
876 effects of dietary challenge on the gut microbiome. *Microbiome* **8**, 15 (2020).
- 877 96. Scott, K. A. *et al.* Revisiting Metchnikoff: Age-related alterations in microbiota-gut-brain axis in  
878 the mouse. *Brain. Behav. Immun.* **65**, 20–32 (2017).
- 879 97. Bajaj, J. S. *et al.* Linkage of gut microbiome with cognition in hepatic encephalopathy. *Am. J.*  
880 *Physiol. Liver Physiol.* **302**, G168–G175 (2012).
- 881 98. Bajaj, J. S. *et al.* Elderly patients have an altered gut-brain axis regardless of the presence of  
882 cirrhosis. *Sci. Rep.* **6**, 1–12 (2016).
- 883 99. Yam, K. Y. *et al.* Ghrelin and hypothalamic NPY/AgRP expression in mice are affected by  
884 chronic early-life stress exposure in a sex-specific manner. *Psychoneuroendocrinology* **86**,  
885 73–77 (2017).
- 886 100. Kang, S. S. *et al.* Diet and exercise orthogonally alter the gut microbiome and reveal  
887 independent associations with anxiety and cognition. *Mol. Neurodegener.* **9**, (2014).
- 888 101. Mischke, M. *et al.* Specific synbiotics in early life protect against diet-induced obesity in adult  
889 mice. *Diabetes, Obes. Metab.* **20**, 1408–1418 (2018).
- 890 102. De Filippo, C. *et al.* Impact of diet in shaping gut microbiota revealed by a comparative study  
891 in children from Europe and rural Africa. *Proc. Natl. Acad. Sci. U. S. A.* **107**, 14691–6 (2010).
- 892 103. Hildebrandt, M. A. *et al.* High Fat Diet Determines the Composition of the Murine Gut  
893 Microbiome Independently of Obesity. *Gastroenterology* **137**, 1716 (2009).
- 894 104. Waters, J. L. & Ley, R. E. The human gut bacteria Christensenellaceae are widespread,  
895 heritable, and associated with health. *BMC Biology* **17**, (2019).
- 896 105. Robertson, R. C. *et al.* Omega-3 polyunsaturated fatty acids critically regulate behaviour and  
897 gut microbiota development in adolescence and adulthood. *Brain. Behav. Immun.* **59**, 21–37  
898 (2017).
- 899 106. Leahy, S. C., Higgins, D. G., Fitzgerald, G. F. & Sinderen, D. Getting better with bifidobacteria.  
900 *J. Appl. Microbiol.* **98**, 1303–1315 (2005).
- 901 107. Rivière, A., Selak, M., Lantin, D., Leroy, F. & De Vuyst, L. Bifidobacteria and butyrate-



902 producing colon bacteria: Importance and strategies for their stimulation in the human gut.  
903 *Frontiers in Microbiology* **7**, 979 (2016).

904

## 905 **Figure Captions**

### 906 **Figure 1. Early dietary low $\omega$ -6/ $\omega$ -3 diet reverses ELS-induced increase in microbiota $\beta$ -** 907 **diversity**

908 **A:** Experimental timeline. **B:** Chao1 plot displaying increase in  $\alpha$ -diversity with age (GLMM at all  
909 sequencing depths  $p < 0.0001$ ; all experimental samples present at a sequencing depth of 11,535  
910 sequences). **C, D:** Average weighted UniFrac distances (within groups) of  $\beta$ -diversity on OTU level  
911 comparing phylogenetic configurations of fecal microbial communities of the four experimental groups  
912 for both ages, Two-Way ANOVA; \*: condition effect, #: diet effect, &: interaction effect condition\*diet,  
913 ^: significant difference with Tukey *post-hoc* test.  $P < 0.05$ . **C:** P42, showing the increase in  $\beta$ -diversity  
914 in ELS-high and not in ELS-low experimental group. **D:** P180, showing increase in  $\beta$ -diversity in ELS-  
915 high and in ELS-low experimental group. **E, F, G, H:** Principal Component Analysis (PCA) and  
916 distance based Redundancy Analysis (db-RDA) of  $\beta$ -diversity aggregated at genus level for both  
917 ages. The 10 genera explaining most variation in the PCA and db-RDA were visualized. **E:** PCA at  
918 P42. **F:** db-RDA at P42, ANOVA like permutation test for Redundancy Analysis,  $p = 0.018$ . **G:** PCA at  
919 P180. **H:** db-RDA at P180, ANOVA like permutation test for Redundancy Analysis,  $p = 0.003$ .  
920 Abbreviations: GLMM: General Linear Mixed Model. OTU: Operational Taxonomic Unit. PCA:  
921 Principal Component Analysis. Db-RDA: Distance-based Redundancy Analysis

922

923

### 924 **Figure 2. Microbiota composition goes through large amount of changes between P42 and** 925 **P180**

926 **A:** Relative abundance at phylum level for P42 and P180. **B:** Relative abundance at genus level for  
927 P42 and P180. **C:** Cladogram showing significant age-mediated changes in relative abundance of  
928 bacterial species at several taxonomic levels.

929

### 930 **Figure 3. Early-life stress and early dietary $\omega$ -6/ $\omega$ -3 ratio affect the microbiota composition at** 931 **P42 in interaction with each other**

932 **A:** Cladogram showing significant condition and diet-mediated changes in the relative abundance of  
933 bacterial taxa at several taxonomic levels at P42. **B – J:** Bar graphs of detected interaction effects  
934 (condition\*diet) for bacterial taxa at P42 (GLMM  $p < 0.05$  &  $q < 0.1$ ). @ main effect of diet, &: interaction  
935 condition\*diet, ^: significant difference with Tukey *post-hoc* test.  $p < 0.05$ . Abbreviation: GLMM:  
936 General Linear Mixed Model.

937

### 938 **Figure 4. Early-life stress and early dietary $\omega$ -6/ $\omega$ -3 ratio affect the microbiota composition at** 939 **P180 in interaction with each other**

940 **A:** Cladogram showing significant condition and diet-mediated changes in the relative abundance of  
941 bacterial taxa at several taxonomic levels at P180. **B – J:** Bar graphs of detected interaction effects  
942 (condition\*diet) for bacterial taxa at P180 (GLMM  $p < 0.05$  &  $q < 0.1$ ). # main effect of Condition, @ main  
943 effect of diet, &: interaction condition\*diet, ^: significant difference with Tukey *post-hoc* test.  $p < 0.05$ .  
944 Abbreviation: GLMM: General Linear Mixed Model.

945

### 946 **Figure 5. Bacterial taxa are correlated with several peripheral and central outcome parameters** 947 **within the same mice**

948 **A:** Correlations between bacterial taxa at P42 and metabolic outcomes parameters at P42. **B:**  
949 Correlations between bacterial taxa at P42 and fatty acid levels in the hippocampus at P42. **C:**  
950 Correlations between bacterial taxa at P42 are fatty acid levels in erythrocytes at P42. **D:** Correlations  
951 between bacterial taxa at P42 and fatty acid levels in the liver at P42.  $-1 < \text{Spearman's } rho < 1$

952

### 953 **Supplementary figure 1. Age impacts phylogenetic $\beta$ -diversity**

954 **A, B:** Principal Component Analysis (PCA) and distance based Redundancy Analysis (db-RDA) of  $\beta$ -  
955 diversity aggregated at genus level for both ages. **C, D:** Average weighted UniFrac distances  
956 (between groups) of  $\beta$ -diversity on OTU level comparing phylogenetic configurations of fecal microbial  
957 communities of the four experimental groups for both ages.



958  
959  
960  
961  
962  
963  
  
964

**Supplementary figure 2. Bacteroidetes taxa *Porphyromonadaceae* and *Odoribacter* negatively correlate with performance on the object location task (OLT)**

**A.**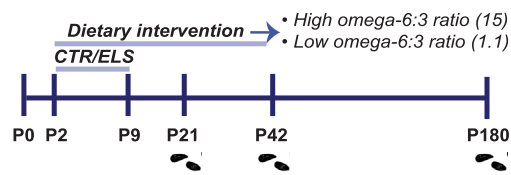**B.**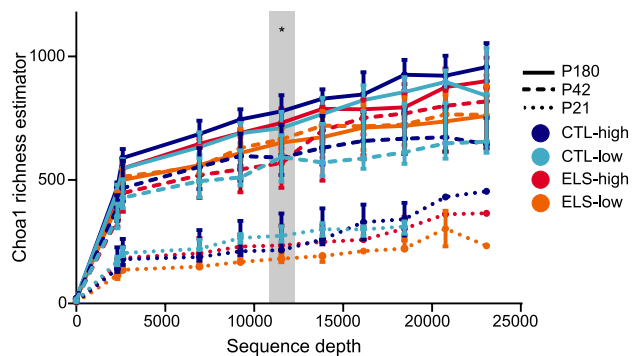**C.**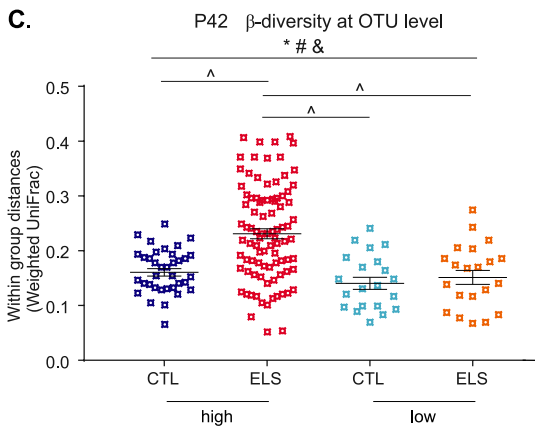**D.**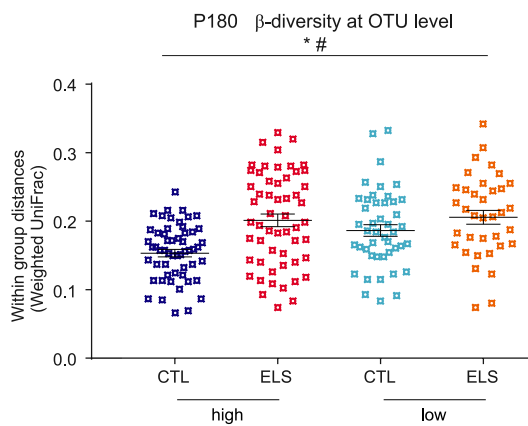**E.**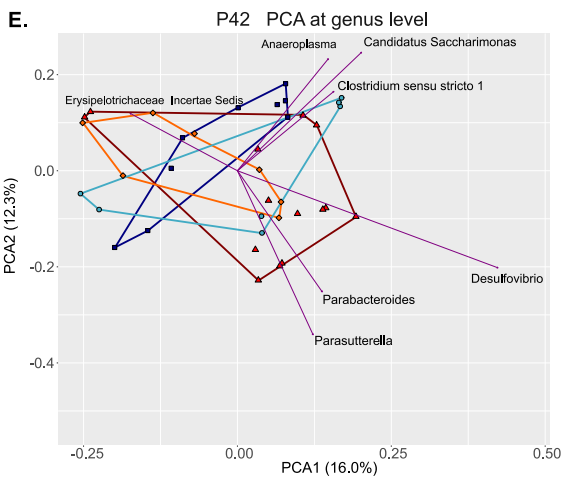**F.**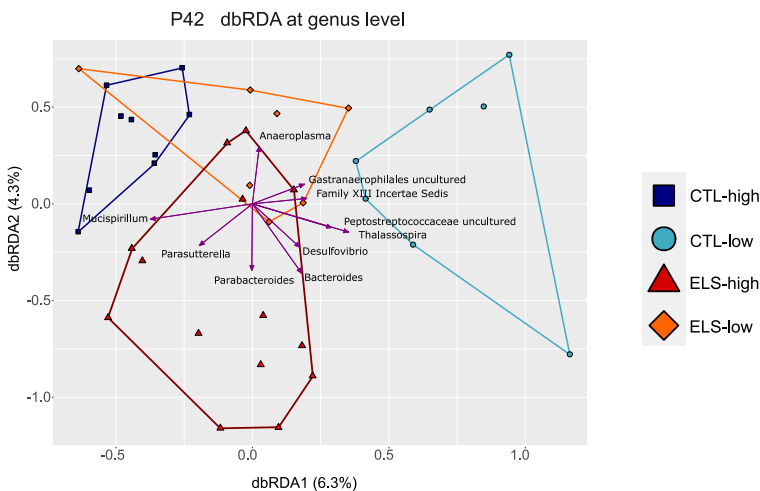**G.**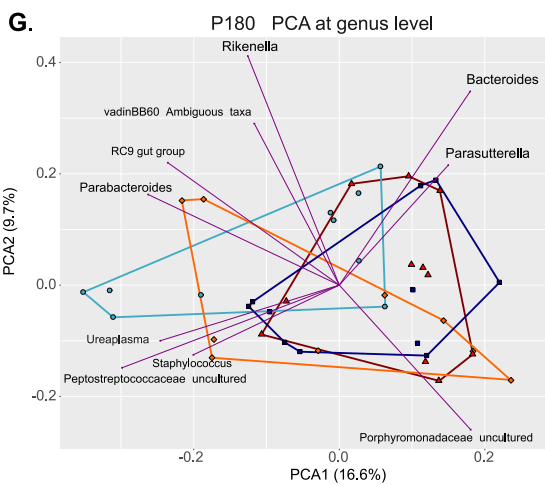**H.**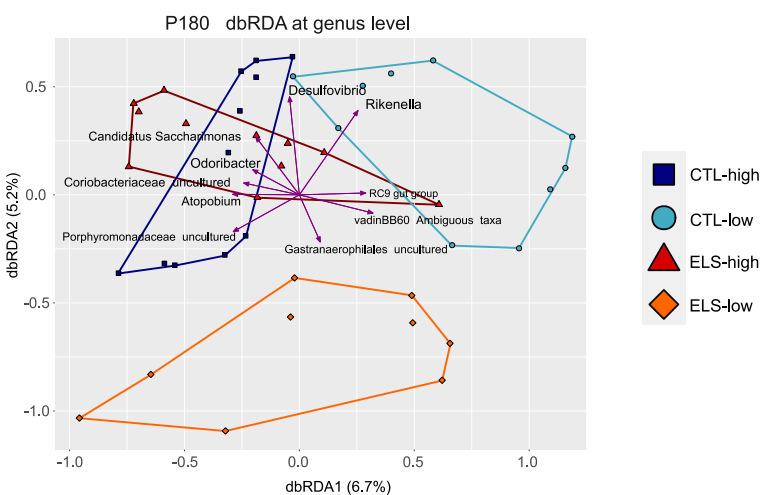

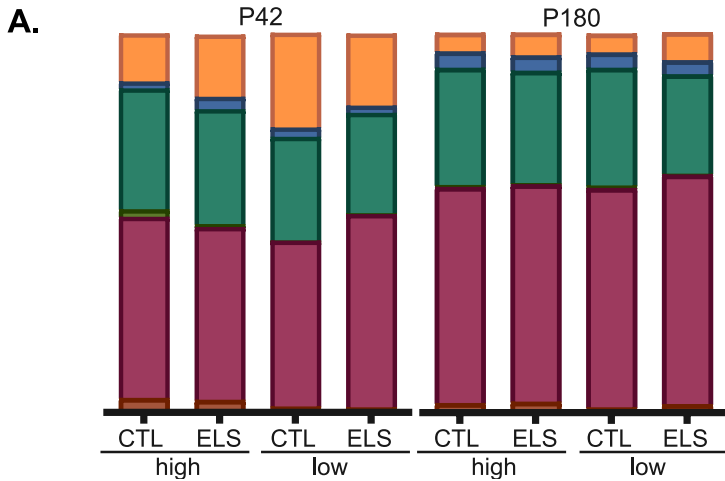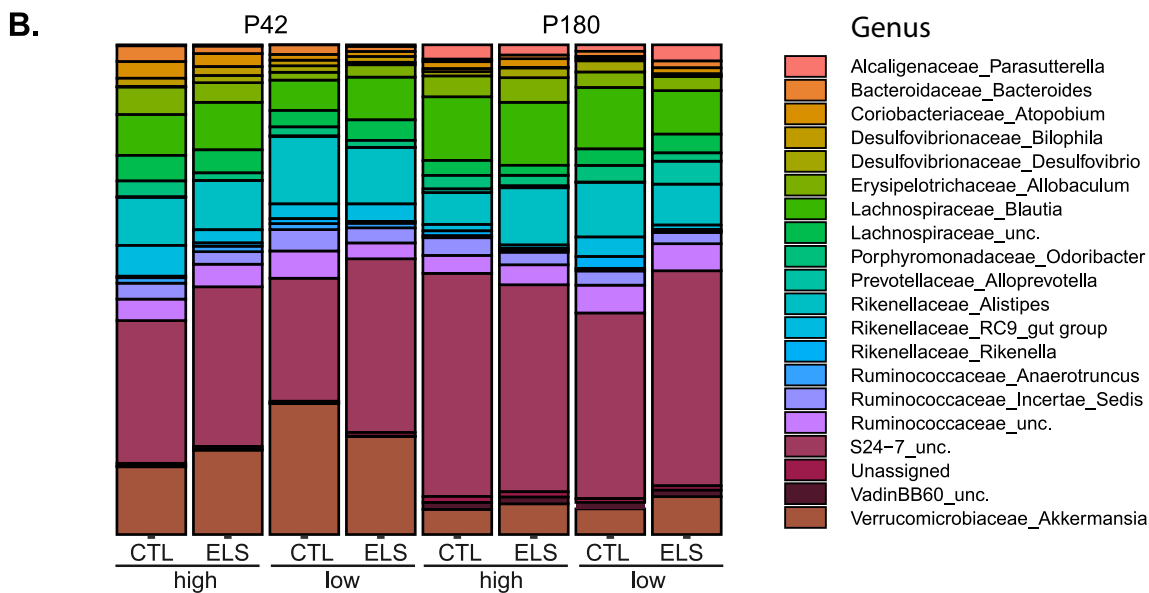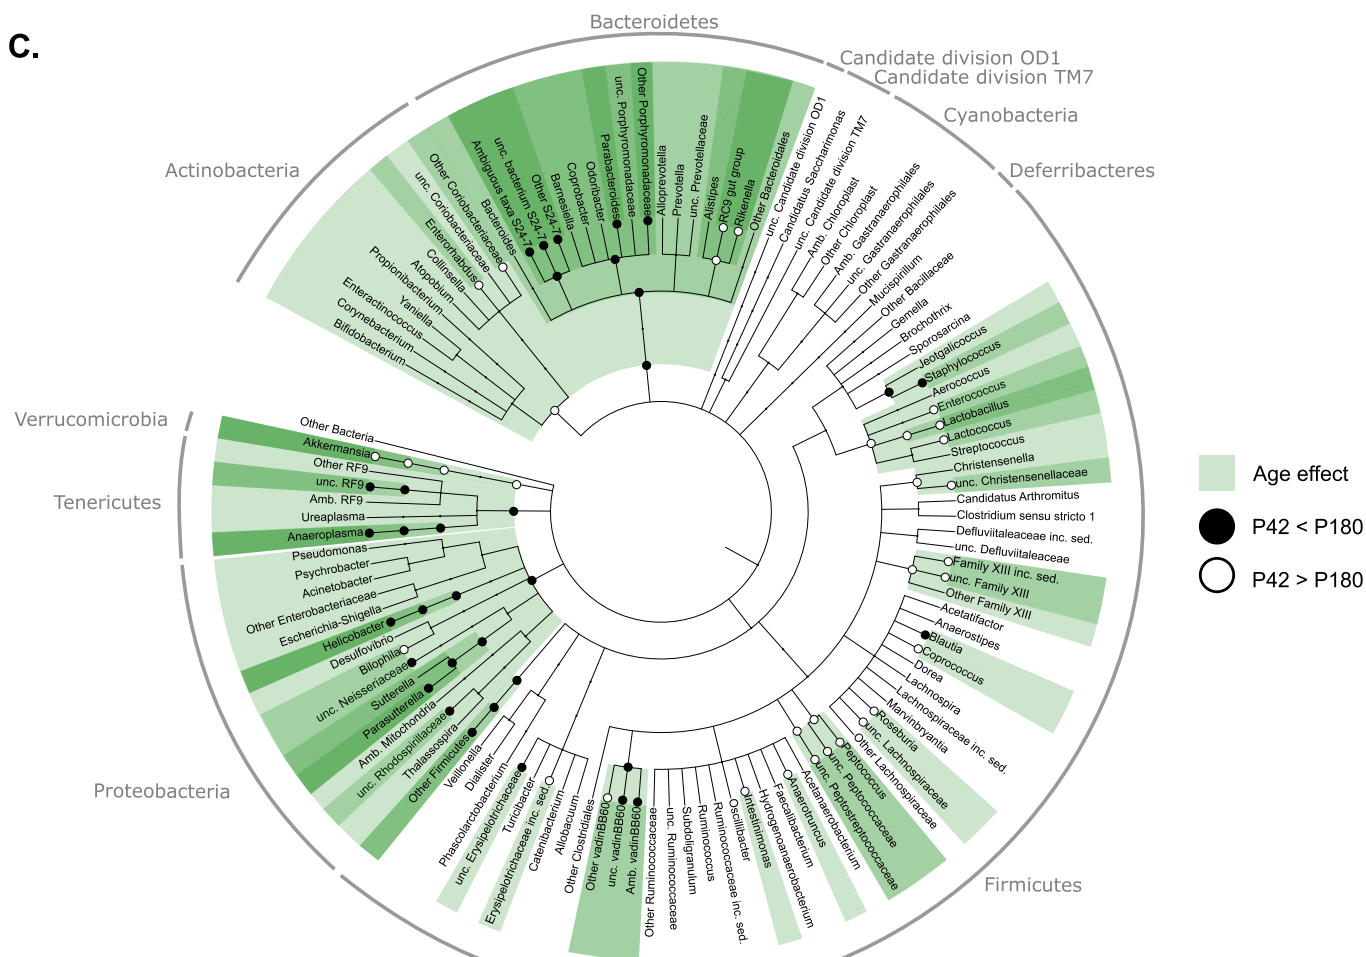

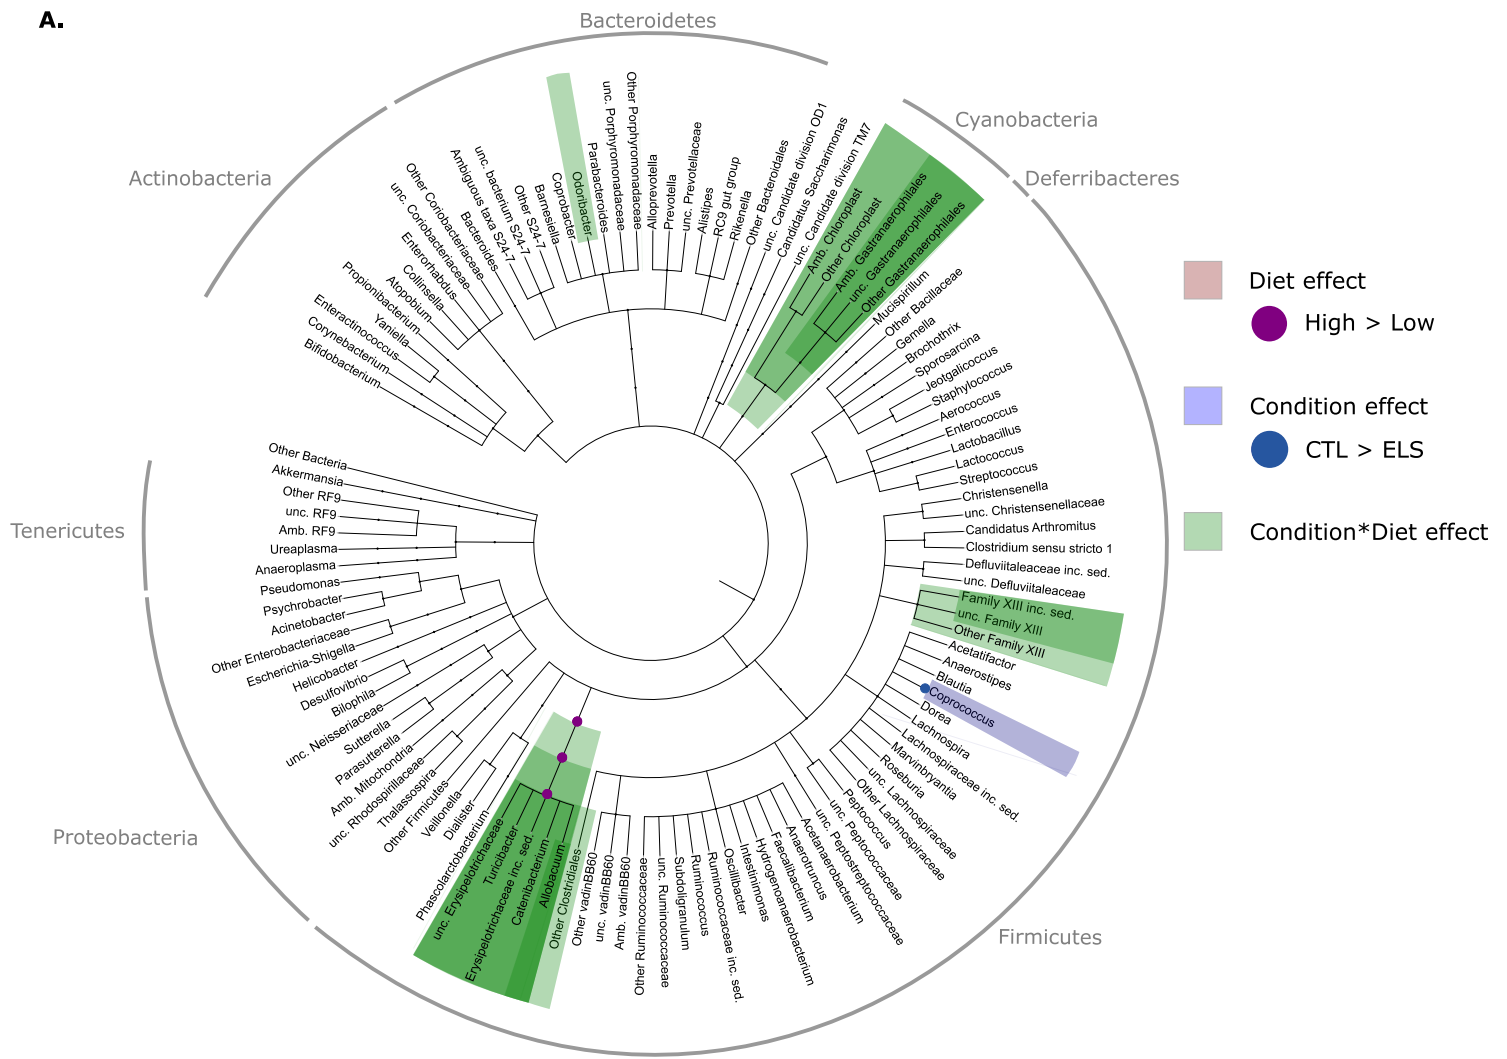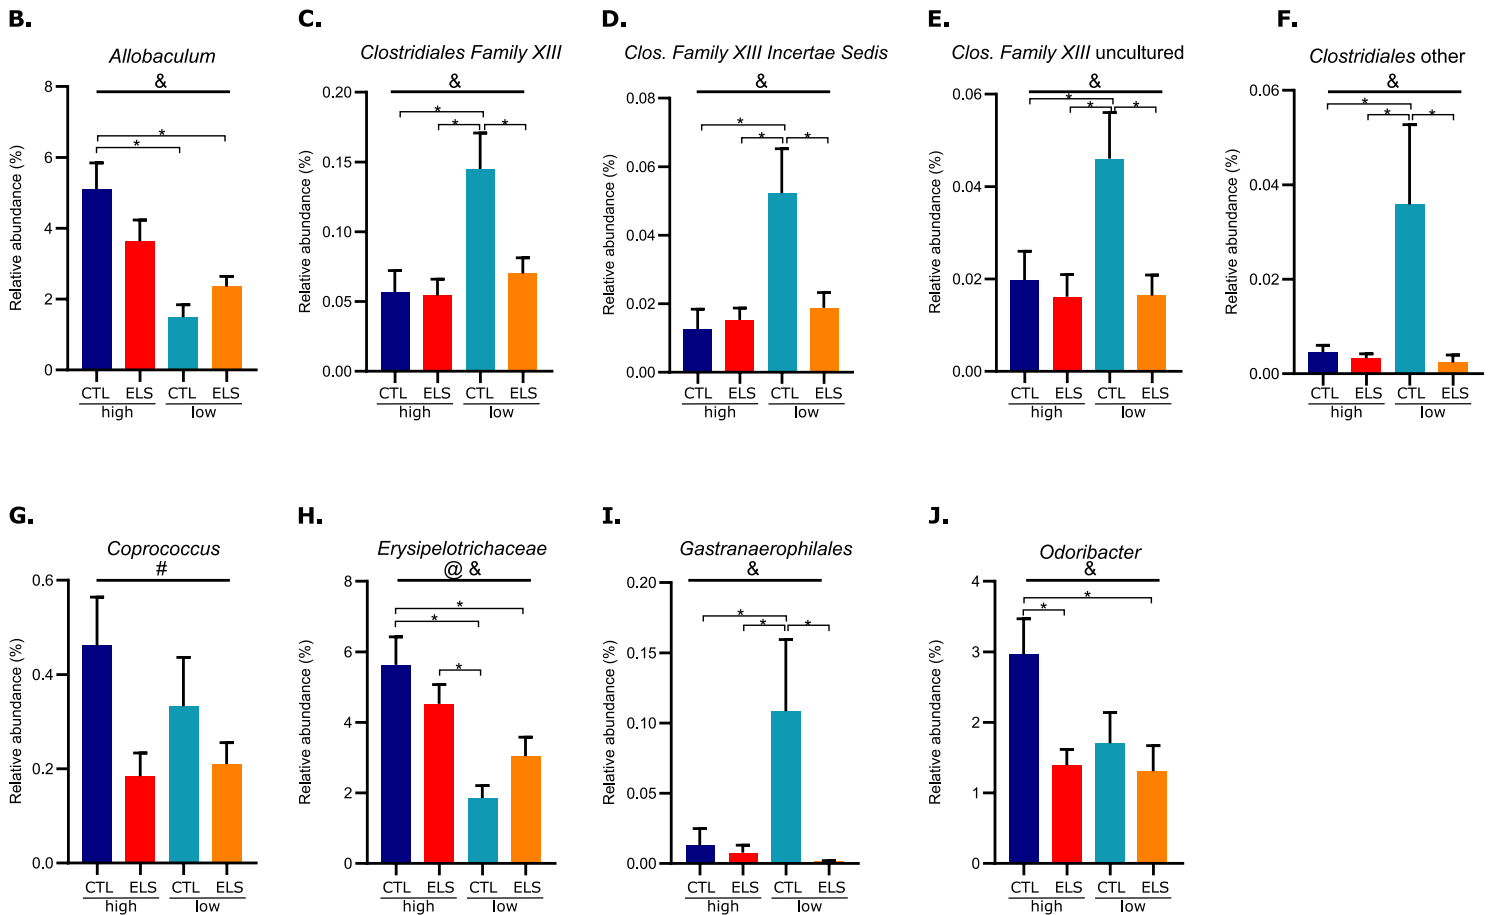

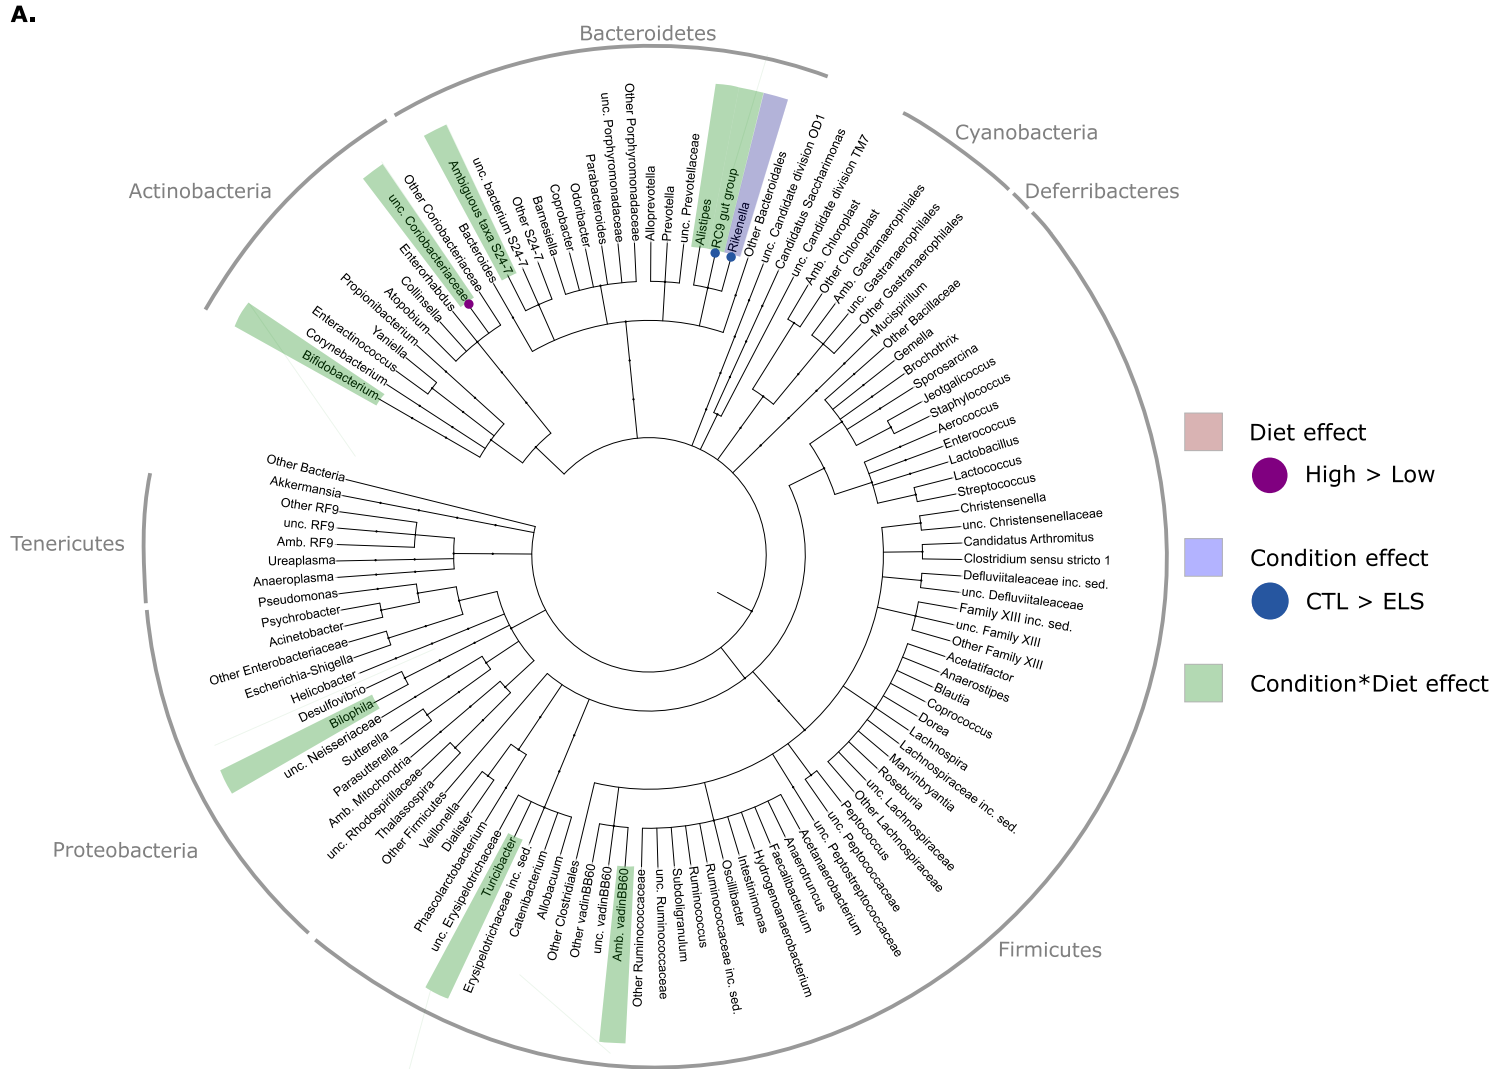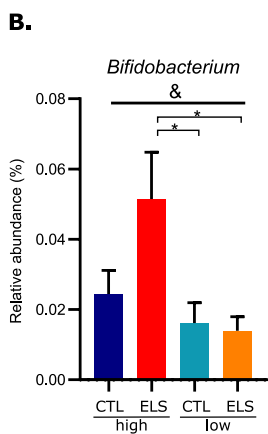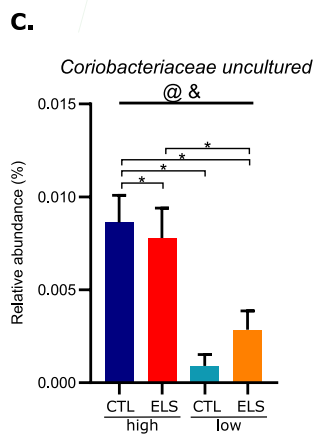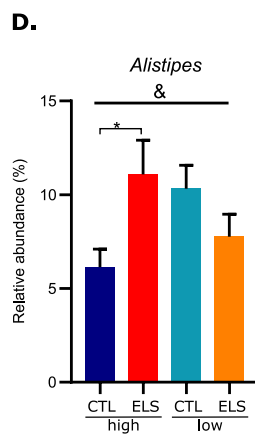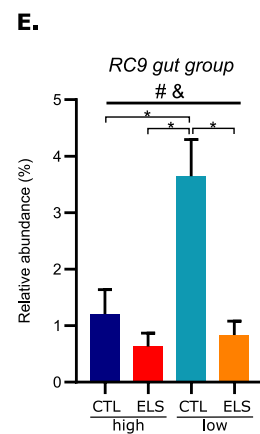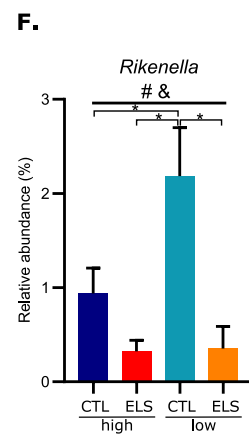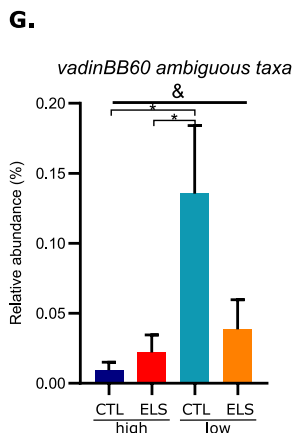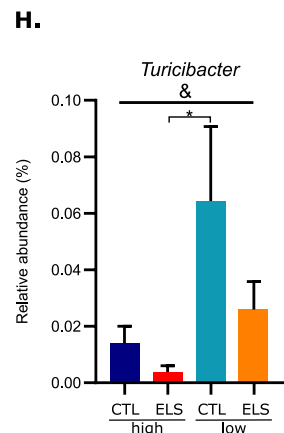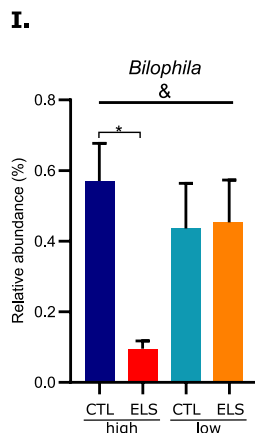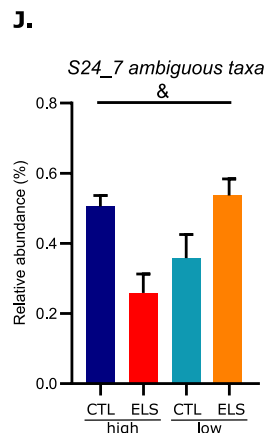

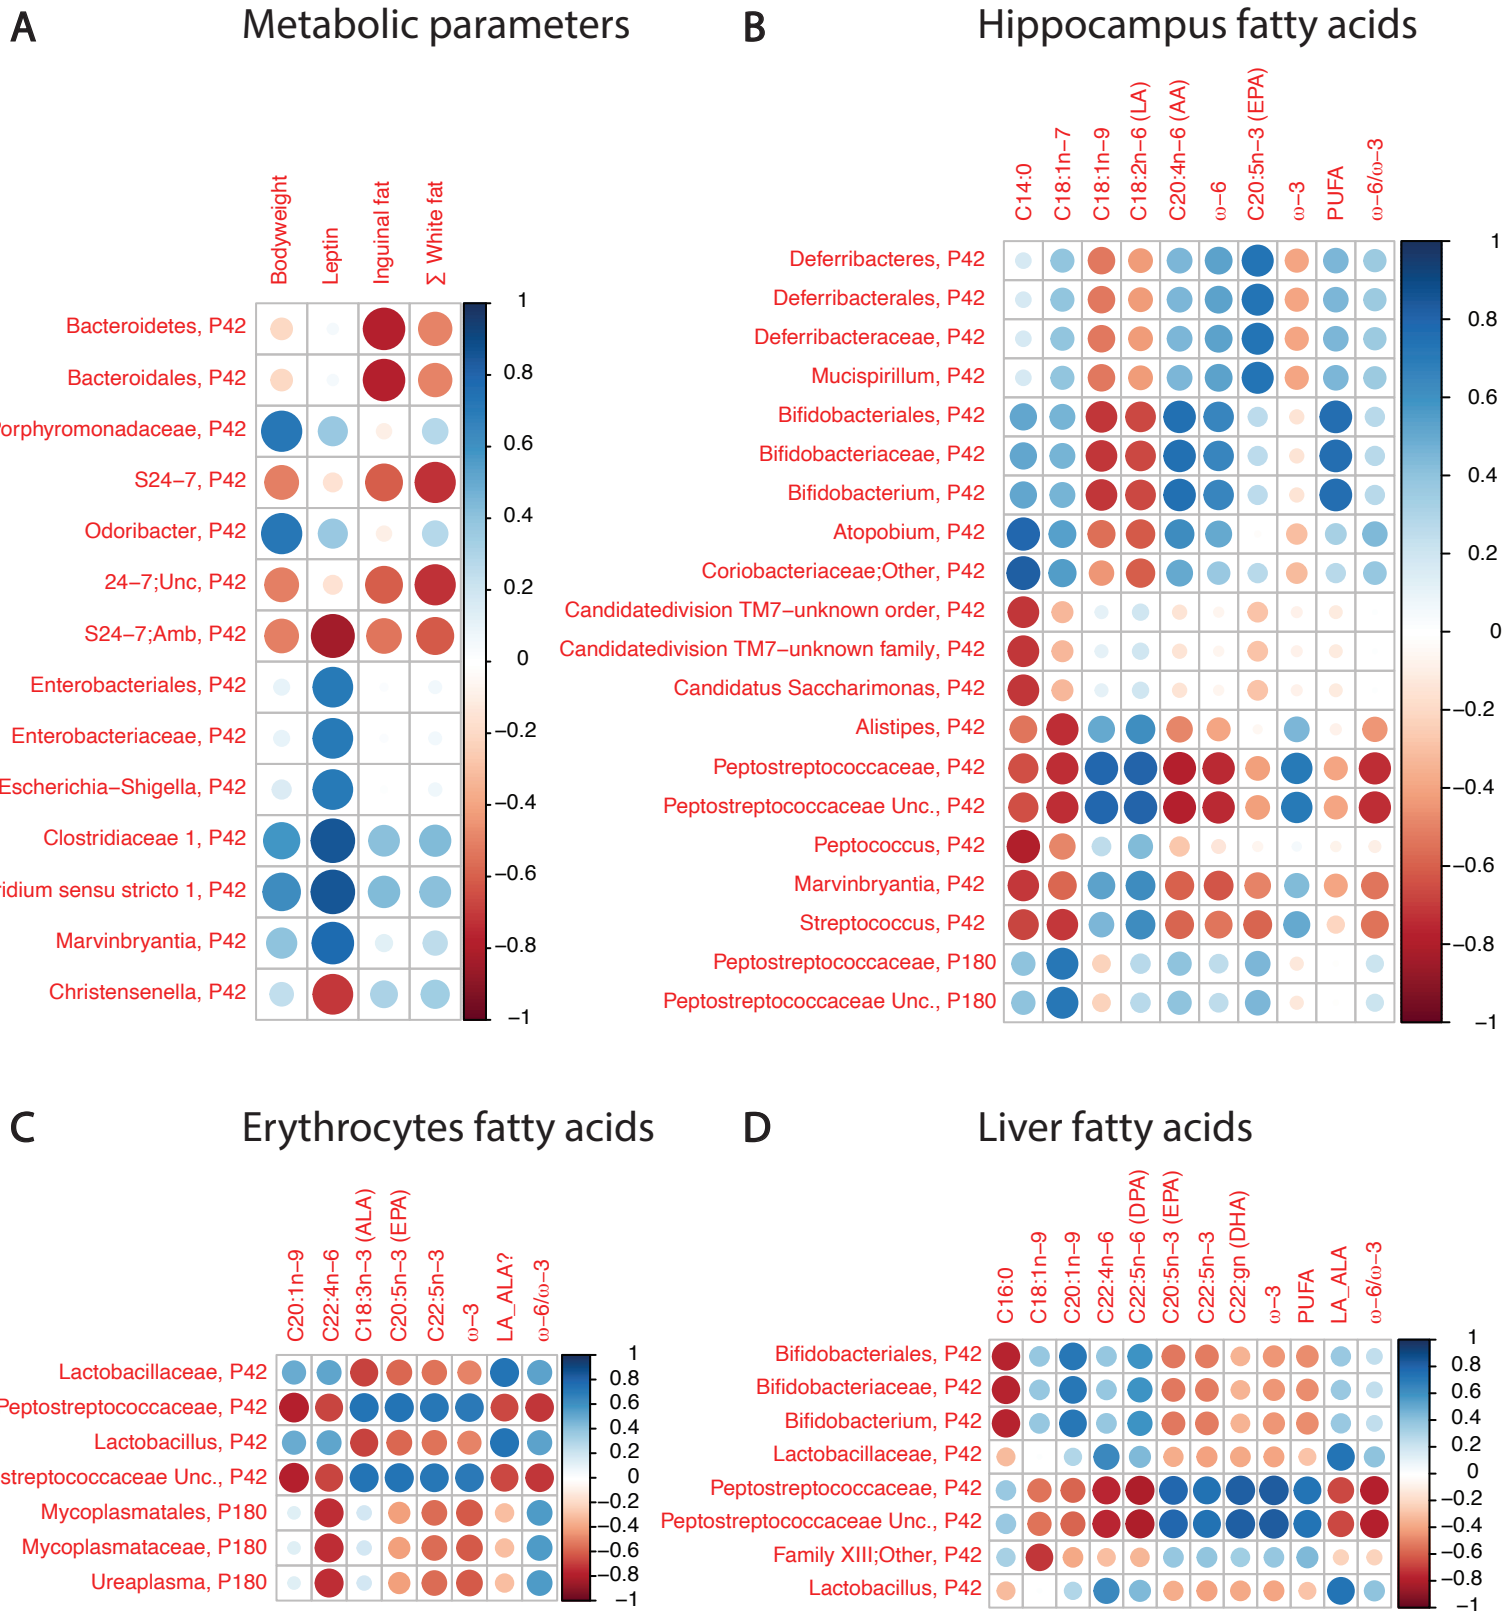

**Table 1. Significant age (P42 vs P180) effects on bacterial taxa at several taxonomic levels. GLMM p<0.05& q<0.1. \*=trend**

| Bacterial group               | Taxonomic level | F-value | p-value | q-value | Litter correction new F-value |
|-------------------------------|-----------------|---------|---------|---------|-------------------------------|
| Actinobacteria                | Phylum          | 5,4757  | 0,0221  | 0,0487  | 3,8779                        |
| Bacteroidetes                 | Phylum          | 34,4424 | <0,0001 | <0,0001 | 34,5562                       |
| Cyanobacteria                 | Phylum          | 3,851   | 0,0537* | 0,0844  | NA                            |
| Proteobacteria                | Phylum          | 4,6601  | 0,0343  | 0,0629  | 2,0967                        |
| Tenericutes                   | Phylum          | 6,4105  | 0,0136  | 0,0374  | 2,4779                        |
| Verrucomicrobia               | Phylum          | 23,9499 | 0,0000  | <0,0001 | 6,3759                        |
| Coriobacteria                 | Class           | 4,7412  | 0,0328  | 0,0802  | 2,8819                        |
| Bacteroidia                   | Class           | 34,4424 | <0,0001 | <0,0001 | 34,5562                       |
| Candidate division TM7_unc    | Class           | 4,4169  | 0,0392  | 0,0862  | 4,4169                        |
| Melainabacteria               | Class           | 3,8439  | 0,0539* | 0,1078* | NA                            |
| Bacilli                       | Class           | 17,3144 | <0,0001 | 0,0004  | NA                            |
| Firmicutes_Other              | Class           | 35,0432 | <0,0001 | <0,0001 | NA                            |
| Betaproteobacteria            | Class           | 11,6267 | 0,0011  | 0,0040  | 7,9829                        |
| Epsilonproteobacteria         | Class           | 5,2764  | 0,0246  | 0,0677  | NA                            |
| Mollicutes                    | Class           | 6,4105  | 0,0136  | 0,0427  | 2,4779                        |
| Verrucomicrobiae              | Class           | 23,9499 | <0,0001 | <0,0001 | 6,3759                        |
| Micrococcales                 | Order           | 6,3277  | 0,0142  | 0,0473  | 0,5026                        |
| Coriobacteriales              | Order           | 4,7412  | 0,0328  | 0,0895  | 2,8819                        |
| Bacteroidales                 | Order           | 34,4424 | <0,0001 | <0,0001 | 34,5562                       |
| Candidate division TM7_unc.   | Order           | 4,4169  | 0,0392  | 0,0980  | NA                            |
| Lactobacillales               | Order           | 18,7414 | <0,0001 | 0,0003  | NA                            |
| Firmicutes_Other              | Order           | 35,0432 | 0,0001  | 0,0001  | NA                            |
| Burkholderiales               | Order           | 11,6324 | 0,0011  | 0,0054  | 7,9858                        |
| Neisseriales                  | Order           | 6,4864  | 0,0131  | 0,0473  | 6,2505                        |
| Campylobacteriales            | Order           | 5,2764  | 0,0246  | 0,0738  | 3,3948                        |
| Anaeroplasmatales             | Order           | 7,4472  | 0,0080  | 0,0344  | 5,4174                        |
| Verrucomicrobiales            | Order           | 23,9499 | 0,0001  | 0,0001  | 6,3759                        |
| Corynebacteriaceae            | Family          | 4,1423  | 0,0456  | 0,0982  | NA                            |
| Micrococcaceae                | Family          | 6,3277  | 0,0142  | 0,0453  | 0,5026                        |
| Coriobacteriaceae             | Family          | 4,7412  | 0,0328  | 0,0799  | 2,8819                        |
| Porphyromonadaceae            | Family          | 7,8001  | 0,0067  | 0,0314  | NA                            |
| Rikenellaceae                 | Family          | 5,4204  | 0,0228  | 0,0638  | 5,4204                        |
| S24-7                         | Family          | 39,2163 | <0,0001 | <0,0001 | 38,3709                       |
| Bacteroidales_other           | Family          | 6,2779  | 0,0146  | 0,0453  | NA                            |
| Candidate division TM7_unc.   | Family          | 4,4169  | 0,0392  | 0,0914  | NA                            |
| Gastranaerophilales_amb. taxa | Family          | 4,8249  | 0,0314  | 0,0798  | 1,4402                        |
| Staphylococcaceae             | Family          | 9,3853  | 0,0031  | 0,0167  | 4,5474                        |
| Enterococcaceae               | Family          | 4,2443  | 0,0431  | 0,0965  | NA                            |
| Lactobacillaceae              | Family          | 18,6121 | 0,0001  | 0,0004  | NA                            |
| Christensenellaceae           | Family          | 30,1204 | <0,0001 | <0,0001 | NA                            |
| Family XIII                   | Family          | 5,4217  | 0,0228  | 0,0638  | 5,0076                        |
| Peptococcaceae                | Family          | 26,1085 | <0,0001 | <0,0001 | 20,4528                       |
| Peptostreptococcaceae         | Family          | 7,5608  | 0,0076  | 0,0321  | 15,6048                       |
| vadinBB60                     | Family          | 9,2728  | 0,0033  | 0,0167  | NA                            |
| Firmicutes_Other              | Family          | 35,0432 | <0,0001 | <0,0001 | NA                            |
| Alcaligenaceae                | Family          | 11,6324 | 0,0011  | 0,0076  | 7,9858                        |
| Neisseriaceae                 | Family          | 6,4864  | 0,0131  | 0,0453  | 6,2505                        |
| Helicobacteraceae             | Family          | 5,2764  | 0,0246  | 0,0656  | NA                            |
| Anaeroplasmataceae            | Family          | 7,4472  | 0,0080  | 0,0321  | 5,4174                        |
| RF9_Amb. Taxa                 | Family          | 7,1975  | 0,0091  | 0,0340  | 1,7373                        |
| RF9_unc.                      | Family          | 11,2451 | 0,0013  | 0,0080  | NA                            |
| Verrucomicrobiaceae           | Family          | 23,9499 | <0,0001 | 0,0001  | 6,3759                        |
| Enteractinococcus             | Genus           | 5,6163  | 0,0206  | 0,0555  | 0,0768                        |
| Collinsella                   | Genus           | 5,3448  | 0,0237  | 0,0625  | 2,8641                        |
| Enterorhabdus                 | Genus           | 17,137  | 0,0001  | 0,0007  | 21,7296                       |
| Coriobacteriaceae_other       | Genus           | 7,912   | 0,0064  | 0,0246  | 1,11                          |
| Parabacteroides               | Genus           | 14,1533 | 0,0003  | 0,0024  | 7,0403                        |
| RC9 gut group                 | Genus           | 12,5971 | 0,0007  | 0,0040  | 11,1118                       |
| Rikenella                     | Genus           | 4,7196  | 0,0332  | 0,0797  | 5,1315                        |
| S24-7 Ambiguous_taxa          | Genus           | 6,3066  | 0,0143  | 0,0425  | 8,1212                        |
| S24-7_unc.                    | Genus           | 39,2924 | <0,0001 | <0,0001 | 39,2924                       |
| S24-7_Other                   | Genus           | 23,8128 | <0,0001 | 0,0001  | NA                            |
| Bacteroidales_other           | Genus           | 6,2779  | 0,0146  | 0,0425  | NA                            |
| Candidate division TM7_unc.   | Genus           | 4,4169  | 0,0392  | 0,0920  | NA                            |
| Gastranaerophilales_amb. taxa | Genus           | 4,8249  | 0,0314  | 0,0770  | 1,4402                        |
| Jeotgaliococcus               | Genus           | 4,9322  | 0,0296  | 0,0743  | 2,3883                        |
| Staphylococcus                | Genus           | 8,5913  | 0,0046  | 0,0205  | 4,7786                        |
| Enterococcus                  | Genus           | 4,2443  | 0,0431  | 0,0990  | NA                            |
| Lactobacillus                 | Genus           | 18,6121 | 0,0001  | 0,0005  | NA                            |
| Lactococcus                   | Genus           | 8,139   | 0,0057  | 0,0246  | NA                            |
| Christensenellaceae_unc.      | Genus           | 31,6138 | <0,0001 | <0,0001 | 30,8904                       |
| Incertae Sedis                | Genus           | 13,8341 | 0,0004  | 0,0025  | 11,1466                       |
| Family XIII_unc.              | Genus           | 10,2869 | 0,0020  | 0,0099  | 9,7733                        |
| Blautia                       | Genus           | 10,0027 | 0,0023  | 0,0109  | 0,014                         |
| Coprococcus                   | Genus           | 7,111   | 0,0095  | 0,0310  | 17,8824                       |
| Roseburia                     | Genus           | 14,1223 | 0,0004  | 0,0024  | 27,0365                       |
| Lachnospiraceae_unc.          | Genus           | 7,9302  | 0,0063  | 0,0246  | NA                            |
| Peptococcus                   | Genus           | 7,9786  | 0,0062  | 0,0246  | NA                            |
| Peptococcaceae_unc.           | Genus           | 24,4036 | <0,0001 | 0,0001  | 19,6722                       |
| Peptostreptococcaceae_unc.    | Genus           | 7,5608  | 0,0076  | 0,0282  | 15,6048                       |
| Anaerotruncus                 | Genus           | 28,9301 | <0,0001 | <0,0001 | 44,3953                       |
| Intestinimonas                | Genus           | 17,3829 | 0,0001  | 0,0007  | 12,9786                       |
| vadinBB60_amb. Taxa           | Genus           | 5,7889  | 0,0188  | 0,0520  | NA                            |
| vadinBB60_unc.                | Genus           | 34,9198 | <0,0001 | <0,0001 | NA                            |
| vadinBB60_other               | Genus           | 28,1352 | <0,0001 | <0,0001 | NA                            |
| Incertae Sedis                | Genus           | 13,6205 | 0,0004  | 0,0026  | NA                            |
| Turicibacter                  | Genus           | 7,0612  | 0,0098  | 0,0310  | 2,4219                        |
| Erysipelotrichaceae_unc.      | Genus           | 6,069   | 0,0162  | 0,0461  | NA                            |
| Firmicutes_other              | Genus           | 35,0432 | <0,0001 | <0,0001 | NA                            |
| Rhodospirillaceae_unc.        | Genus           | 7,2704  | 0,0088  | 0,0306  | 4,1117                        |
| Parasutterella                | Genus           | 11,6324 | 0,0011  | 0,0058  | 7,9858                        |
| Neisseriaceae_unc.            | Genus           | 6,4864  | 0,0131  | 0,0403  | 6,2505                        |
| Bilophila                     | Genus           | 26,445  | <0,0001 | <0,0001 | NA                            |
| Helicobacter                  | Genus           | 5,2764  | 0,0246  | 0,0633  | NA                            |
| Anaeroplasma                  | Genus           | 7,4472  | 0,0080  | 0,0289  | 5,4174                        |
| RF9_amb. taxa                 | Genus           | 7,1975  | 0,0091  | 0,0307  | 1,7373                        |
| RF9_unc.                      | Genus           | 11,2451 | 0,0013  | 0,0066  | NA                            |
| Akkermansia                   | Genus           | 23,9499 | <0,0001 | 0,0001  | 6,3759                        |

**Table 2. Significant condition and diet effects on bacterial taxa at several taxonomic levels at P42 and P180. GLMM  $p < 0.05$  &  $q < 0.1$ .**

| Bacterial group          | Taxonomic level | Age  | Effect           | F-value | p-value | q-value | Litter correction |
|--------------------------|-----------------|------|------------------|---------|---------|---------|-------------------|
|                          |                 |      |                  |         |         |         | new F-value       |
| Cyanobacteria            | Phylum          | P42  | Condition * Diet | 5.134   | 0.005   | 0.050   | NA                |
| Melainabacteria          | Class           | P42  | Condition * Diet | 5.134   | 0.005   | 0.048   | NA                |
| Gastranaerophilales      | Order           | P42  | Condition * Diet | 5.134   | 0.005   | 0.068   | NA                |
| Erysipelotrichia         | Class           | P42  | Diet             | 14.974  | 0.000   | 0.009   | 11.532            |
| Erysipelotrichia         | Class           | P42  | Condition * Diet | 6.277   | 0.002   | 0.033   | 5.057             |
| Erysipelotrichales       | Order           | P42  | Diet             | 14.974  | 0.000   | 0.009   | 11.532            |
| Erysipelotrichales       | Order           | P42  | Condition * Diet | 6.277   | 0.002   | 0.047   | 5.057             |
| Erysipelotrichaceae      | Family          | P42  | Diet             | 14.974  | 0.000   | 0.009   | 11.532            |
| Erysipelotrichaceae      | Family          | P42  | Condition * Diet | 6.277   | 0.002   | 0.044   | 5.057             |
| Allobaculum              | Genus           | P42  | Condition * Diet | 5.733   | 0.003   | 0.033   | NA                |
| Clostridiales FamilyXIII | Family          | P42  | Condition * Diet | 6.331   | 0.002   | 0.044   | NA                |
| FamilyXIII IncertaeSedis | Genus           | P42  | Condition * Diet | 6.931   | 0.001   | 0.026   | NA                |
| FamilyXIII_unc.          | Genus           | P42  | Condition * Diet | 4.381   | 0.011   | 0.043   | NA                |
| Clostridiales_Other      | Family          | P42  | Condition * Diet | 5.297   | 0.004   | 0.061   | NA                |
| Clostridiales_Other      | Genus           | P42  | Condition * Diet | 5.297   | 0.004   | 0.033   | NA                |
| Coprococcus              | Genus           | P42  | Condition        | 2.985   | 0.045   | 0.148   | 4.302             |
| Odoribacter              | Genus           | P42  | Condition * Diet | 4.327   | 0.011   | 0.043   | 4.327             |
| Bifidobacterium          | Genus           | P180 | Condition * Diet | 4.027   | 0.014   | 0.036   | NA                |
| Coriobacteriaceae_unc.   | Genus           | P180 | Diet             | 24.924  | 0.000   | 0.001   | NA                |
| Coriobacteriaceae_unc.   | Genus           | P180 | Condition * Diet | 8.575   | 0.000   | 0.002   | NA                |
| Alistipes                | Genus           | P180 | Condition * Diet | 2.928   | 0.046   | 0.075   | NA                |
| RC9 gut group            | Genus           | P180 | Condition        | 10.670  | 0.002   | 0.074   | 4.950             |
| RC9 gut group            | Genus           | P180 | Condition * Diet | 10.437  | 0.000   | 0.001   | 6.522             |
| Rikenella                | Genus           | P180 | Condition        | 12.487  | 0.001   | 0.070   | 8.791             |
| S24-7_Amb. taxa          | Genus           | P180 | Condition * Diet | 6.454   | 0.001   | 0.007   | 3.467             |
| VadinBB60_Amb. taxa      | Genus           | P180 | Condition * Diet | 4.677   | 0.007   | 0.026   | NA                |
| Turcibacter              | Genus           | P180 | Condition * Diet | 3.601   | 0.022   | 0.043   | NA                |
| Bilophila                | Genus           | P180 | Condition * Diet | 4.429   | 0.009   | 0.027   | NA                |
